# Supplementary material
Source: Elsevier journal article supplement (https://hormoz.dfci.harvard.edu/s/mmc6.pdf)
Supplement: mmc6 [file mmc6.pdf]

## Inferring Cell-State Transition Dynamics from Lineage Trees and Endpoint Single-Cell Measurements

### Graphical Abstract

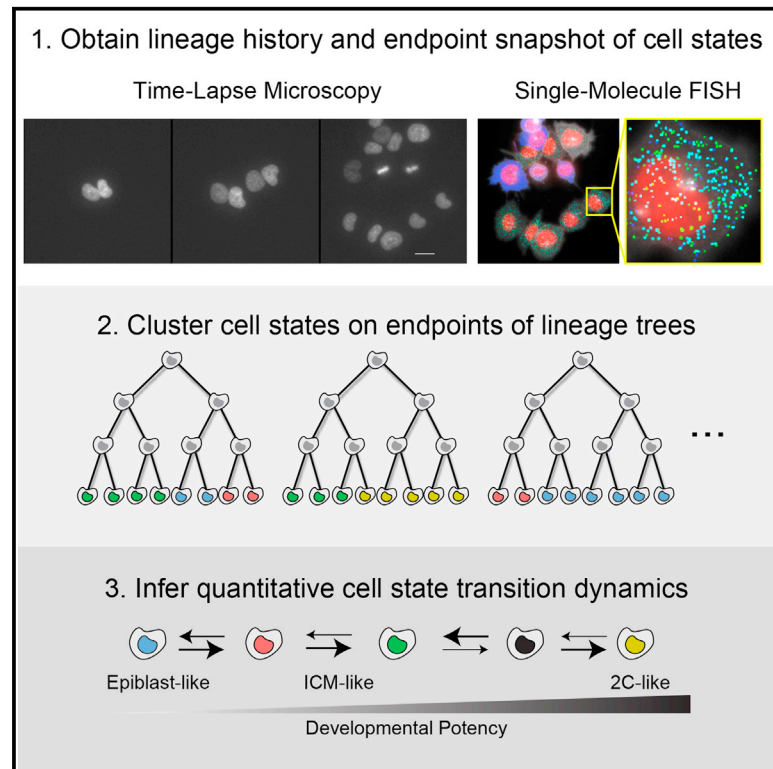

### Authors

Sahand Hormoz, Zakary S. Singer, James M. Linton, Yaron E. Antebi, Boris I. Shraiman, Michael B. Elowitz

### Correspondence

shraiman@kitp.ucsb.edu (B.I.S.), melowitz@caltech.edu (M.B.E.)

### Highlights

- Inference of cell-state transition dynamics without perturbations or reporters
- This new approach is based on clustering of cell states on cell pedigrees
- Discovery of a stochastic, reversible, chain-like network of ES cell-state transitions
- Simulations show ability to infer diverse cell-state transition networks and dynamics

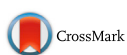

# Inferring Cell-State Transition Dynamics from Lineage Trees and Endpoint Single-Cell Measurements

Sahand Hormoz,<sup>1,3,4</sup> Zakary S. Singer,<sup>1,4</sup> James M. Linton,<sup>1</sup> Yaron E. Antebi,<sup>1</sup> Boris I. Shraiman,<sup>3,\*</sup> and Michael B. Elowitz<sup>1,2,5,\*</sup>

<sup>1</sup>Division of Biology and Biological Engineering, California Institute of Technology, Pasadena, CA 91125, USA

<sup>2</sup>Howard Hughes Medical Institute (HHMI) and Department of Applied Physics, California Institute of Technology, Pasadena, CA 91125, USA

<sup>3</sup>Kavli Institute for Theoretical Physics, University of California, Santa Barbara, CA 93106, USA

<sup>4</sup>Co-first author

<sup>5</sup>Lead Contact

\*Correspondence: [shraiman@kitp.ucsb.edu](mailto:shraiman@kitp.ucsb.edu) (B.I.S.), [melowitz@caltech.edu](mailto:melowitz@caltech.edu) (M.B.E.)

<http://dx.doi.org/10.1016/j.cels.2016.10.015>

## SUMMARY

As they proliferate, living cells undergo transitions between specific molecularly and developmentally distinct states. Despite the functional centrality of these transitions in multicellular organisms, it has remained challenging to determine which transitions occur and at what rates without perturbations and cell engineering. Here, we introduce kin correlation analysis (KCA) and show that quantitative cell-state transition dynamics can be inferred, without direct observation, from the clustering of cell states on pedigrees (lineage trees). Combining KCA with pedigrees obtained from time-lapse imaging and endpoint single-molecule RNA-fluorescence in situ hybridization (RNA-FISH) measurements of gene expression, we determined the cell-state transition network of mouse embryonic stem (ES) cells. This analysis revealed that mouse ES cells exhibit stochastic and reversible transitions along a linear chain of states ranging from 2C-like to epiblast-like. Our approach is broadly applicable and may be applied to systems with irreversible transitions and non-stationary dynamics, such as in cancer and development.

## INTRODUCTION

In many multicellular contexts, cells switch among molecularly and phenotypically distinct states as they proliferate through repeated divisions (Figure 1A). Key biological functions often depend critically on the dynamics of these cell-state transitions: on which transitions are forbidden or permitted, at what rates they occur, and whether they are stochastic or deterministic. For example, regulation of fat tissue depends on adipocyte differentiation and de-differentiation rates (Ahrends et al., 2014; Poloni et al., 2012); maintenance of intestinal crypts and the epidermis are governed by the relative rates of symmetric and

asymmetric stem cell divisions (Simons and Clevers, 2011); development of the full repertoire of immune cell types is regulated by stochastic cell-state transitions (Suda et al., 1983, 1984a, 1984b); and lineage commitment in embryonic development and later in *trans*- or de-differentiation depend critically on dynamic transitions (Dietrich and Hiiragi, 2007; Ohnishi et al., 2014; Slack and Tosh, 2001; Talchai et al., 2012; Tata et al., 2013; Yamanaka et al., 2010). Cell-state transition dynamics are also important in disease, as their dysregulation can lead to type 2 diabetes (Talchai et al., 2012) and obesity (Ahrends et al., 2014; Ristow et al., 1998). Similarly, in cancer, the rates of transition between distinct cell states within a tumor impinges on the effectiveness of treatments (Gupta et al., 2011; Leder et al., 2014) and the likelihood of metastasis (Wagenblast et al., 2015).

The notion of cell state can vary significantly depending on the particular biological system and the context of the study. Here, we consider cell states that satisfy certain criteria: first, a cell state must be heritable, such that after a cell division, the daughter cells, by default, remain in the same state as the parent cell unless a transition has occurred. This criterion excludes transient gene expression fluctuations. Second, different states should exhibit significant differences in the expression of multiple genes. Thus, although a single marker gene can be used to identify a particular cell state, the changes in the expression level of the marker gene must be correlated with that of other genes. Third, cell states should ideally possess distinguishing phenotypic properties such as morphological features (Thiery et al., 2009), chromatin structure (Kagey et al., 2010), developmental potential (Wu and Izpisua Belmonte, 2015), or functional attributes (Duffy et al., 2012; Lu et al., 2015), although these may not always be readily apparent.

Mouse embryonic stem (ES) cells provide an important model system in which to study cell-state transition dynamics. Multiple molecularly and phenotypically distinct ES cell states co-exist and stochastically interconvert in standard culture conditions (containing serum and leukemia inhibitory factor [LIF]). In previous studies, these states were shown to be heritable and differ in gene expression, developmental potential, global epigenetic profiles, and other characteristics (Canham et al., 2010; Chambers et al., 2007; Falco et al., 2007; Hayashi et al., 2008;

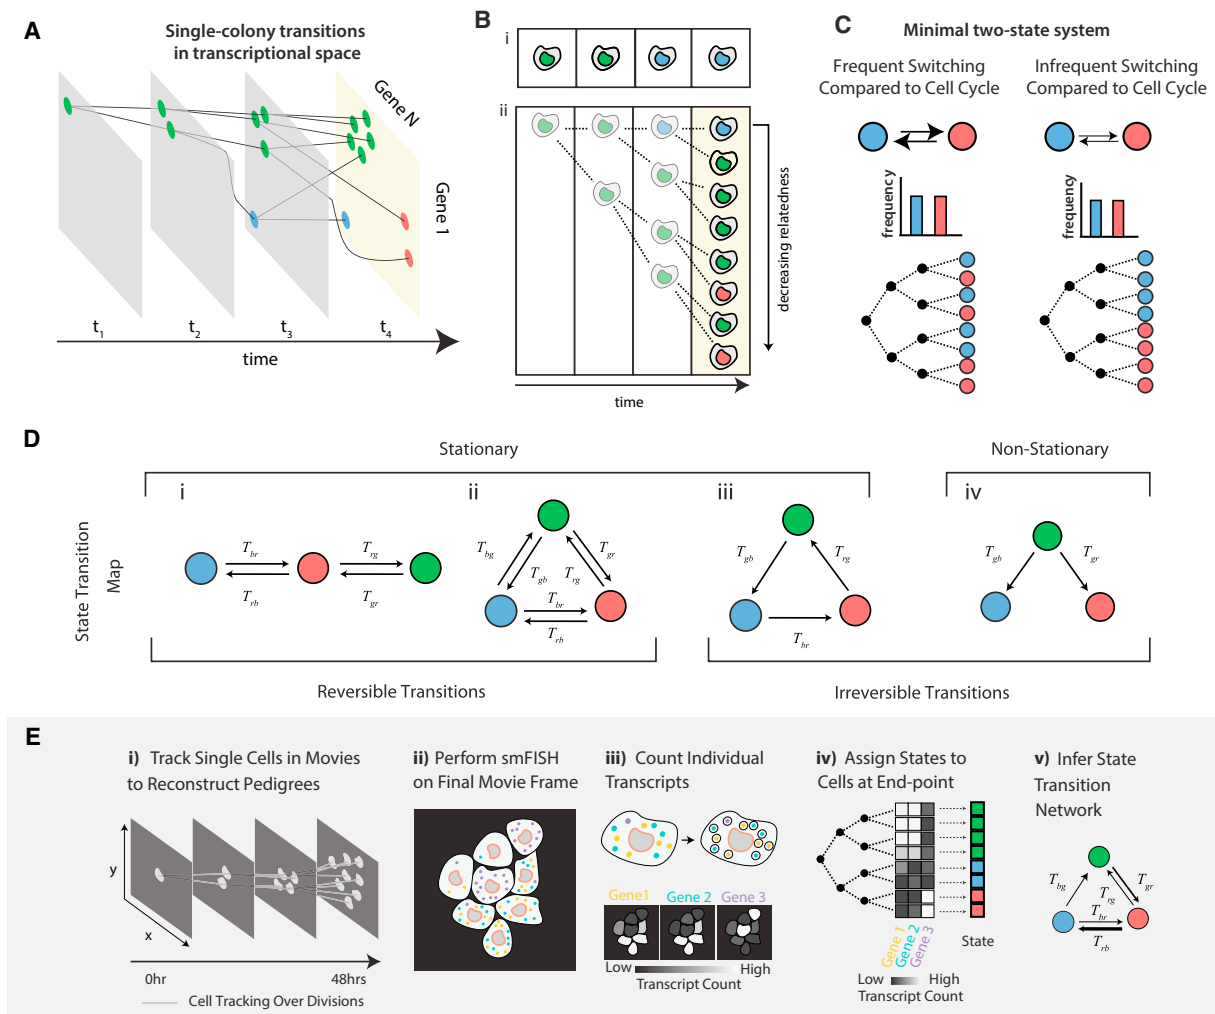

**Figure 1. Cell-State Transition Networks and the Experimental Platform for Inferring Transition Rates**

(A) Trajectory of a proliferating colony of cells in gene expression space (schematic). At each time point, a cell can independently and stochastically change its cell state (color) and corresponding gene expression profile. Following a division, both daughter cells inherit the state of the parent but then follow independent stochastic dynamic trajectories.

(B) (i) Dynamics can be determined by directly observing state transitions in a single cell over time, neglecting cell proliferation. (ii) Proliferating colonies provide an indirect record of the history of cell-state transitions. Here, the cell of interest (top row) is in the blue state but is related to a sister and cousins that are in the green state, indicating a likely green-to-blue transition in its recent past.

(C) Different dynamics give rise to different degrees of clustering on a pedigree (schematic). Frequent or infrequent switching between red and blue states leads to weak or strong clustering of cell states, respectively. The distribution of states is independent of the switching rates in this simple example (bar plots).

(D) Cell-state transition networks can be classified based on whether the population fraction of each state is constant (stationary) or changing over time (non-stationary). A subset of stationary networks also exhibit reversible dynamics.

(E) Experimental approach. (i) Live cells are tracked as they grow and divide using time-lapse microscopy. (ii) After the movie, the cells are fixed and stained for smFISH. (iii) Individual molecules of mRNA are detected and counted in each cell. (iv) The pedigree reconstructed from (i) is combined with the smFISH measurements, and each cell is assigned an expression state. (v) Using KCA, cell-state transition dynamics are inferred across many of these state-associated pedigrees (see Box 1).

Macfarlan et al., 2012; Niwa et al., 2009; Singer et al., 2014; Singh et al., 2007; Yamaji et al., 2013; Yamanaka et al., 2010; Zalzman et al., 2010). Understanding the transitions among these cell states is important for applications seeking to control differentiation of these or other pluripotent cells for regenerative medicine. Recent improvements in single-cell profiling have enabled genome-wide analysis of ES cell states (Klein et al., 2015; Kumar et al., 2014). However, because these techniques do not track individual cells over

time, they cannot provide information on transition dynamics. Other elegant studies have estimated transition dynamics of ES cells using either direct time-lapse microscopy, sorting of subpopulations, or by characterizing in static images the intra- and inter-colony gene expression heterogeneity (Canham et al., 2010; Chambers et al., 2007; Furusawa et al., 2004; Kallmar et al., 2009; Kumar et al., 2014; Rugg-Gunn et al., 2012; Singh et al., 2007; Suda et al., 1983; Toyooka et al., 2008; Zalzman et al., 2010).

Here, we describe a new approach to infer quantitative cell-state transition dynamics in which cells transition stochastically and independently from one heritable gene expression state to another. This approach does not require sorting, perturbations, or fluorescent reporters of gene expression. Rather than attempt to follow transitions directly in each individual cell over time (e.g., from the green to blue states in [Figure 1Bi](#)), we instead take advantage of cell division to infer dynamic information indirectly. Because sister cells start out in the same state, they generally provide independent realizations of transition dynamics starting from the same initial condition. Knowing the states of a cell's sisters, cousins, and other relatives provides information about the likely history of that cell's past transitions, as illustrated schematically in [Figure 1Bii](#). Under some conditions, combining the lineage relationships, or pedigree, for a set of individual cells with their endpoint states, can enable inference of cell-state transition rates ([Figure 1C](#)). This approach is informative as long as cell states typically persist for durations longer than a cell cycle, but cannot access dynamics within a single cell cycle. This basic idea was recently described in [Hormoz et al. \(2015\)](#) for a special case, but is generalized and applied to embryonic stem cells here.

Using this approach to measure transition rates among multiple states can provide information about a cell's overall state transition network, defined as the set of transitions between cell states that can occur in a given context. In principle, many different kinds of transition networks are possible, including all-to-all, chain-like, cyclical, or tree-like ([Figure 1D](#)). Some of these can produce stationary dynamics that maintain a constant distribution of states over time ([Figure 1D](#), i–iii), and a further subset of these exhibit reversible transitions ([Figure 1D](#), i and ii) (see [Box 1](#) for definitions). Other networks, including binary fate trees, may include irreversible transitions ([Figure 1D](#), iii–iv). Moreover, for any given network topology, the quantitative rates of each transition control the dynamic behavior of cells. These examples are idealized and natural systems can be more complex. For example, transition rates could depend on position in the tissue (e.g., through morphogen gradients) or on time. But for the embryonic stem cell system considered here, we show that this approach is sufficient to identify the cell-state transition network and quantify its rates in a non-perturbative fashion.

Here, we describe an experimental platform that combines time-lapse movies to determine lineage relationships with single-molecule RNA-fluorescence in situ hybridization (RNA-FISH) of multiple genes to determine endpoint gene expression states ([Figure 1E](#)). For other elegant examples of combining time-lapse imaging with endpoint readout see [Filipczyk et al. \(2015\)](#), [Lee et al. \(2014\)](#), and [Purvis et al. \(2012\)](#). Using this approach, we discovered that ES cells exhibit a distinct cell-state transition network based on reversible stochastic transitions along a linear chain of states. We also generalize the previous theoretical framework to enable analysis of networks containing irreversible and non-stationary dynamics. Finally, because this is an inference approach, we provide a set of self-consistency checks to evaluate whether the assumptions of the underlying model are indeed valid. Thus, we believe the combined theoretical-experimental approach developed here should be applicable to other biological systems in which cells transition among multiple states.

## RESULTS

### Cell-State Transition Networks Can Be Inferred from Clustering of States on Pedigrees

To motivate the inference method, we first consider a simple minimal transition network ([Figure 1C](#)). In this example, cells stochastically transition between the two states at equal rates as they proliferate, such that the average population fraction of each state does not change over time. When transition rates per cell cycle are high, the states of sister cells rapidly become uncorrelated with one another, leading to no apparent clustering of states on the pedigree. By contrast, when transition rates per cell cycle are low and cells remain in the same state for multiple generations, closely related cells are more likely to be observed in the same state. As a result, different transition rates produce different degrees of clustering on the pedigree. Conversely, measurements of clustering between states of related cells can be used to infer transition rates. More specifically, clustering of cell states can be quantified by measuring how frequently related cells are observed to be in a given set of states, as a function of how long ago they shared a common ancestor. These correlations, computed between all pairs or, more generally, all triplets of cells over many pedigrees, enable quantitative inference of the transition dynamics through an approach we term kin correlation analysis (KCA), which is described briefly in [Box 1](#) and in more detail in the [STAR Methods](#). As derived in [Box 1](#), dynamics of reversible transition networks can be inferred from the observed correlations between pairs of related cells (two-cell correlations), whereas inference of networks with irreversible transitions requires knowledge of the correlations between triplets of cells (three-cell correlations). To demonstrate that KCA can be used to infer the dynamics of the full range of transition networks depicted in [Figure 1D](#), we simulated the transition dynamics of proliferating cells under different networks for physiologically relevant transition rates (see the [STAR Methods](#)), including reversible, irreversible, and non-stationary dynamics ([Figure S1](#)). Taken together, these results demonstrate that, at least under the idealized conditions of these models, KCA enables quantitative inference of diverse cell-state transition networks. Limitations and self-consistency checks on the method are discussed more below.

To experimentally implement KCA, we developed a platform that combines two types of measurements: first, using time-lapse microscopy and custom software (see the [STAR Methods](#)), we track individual cells over multiple generations, as they grow from a single cell into a microcolony, and use this data to construct the pedigrees representing the lineage relationships among cells, with no gene expression measurements ([Figure 1Ei](#)). Second, at the end of the movie, we used single-molecule RNA-FISH (smFISH) ([Femino et al., 1998](#); [Raj et al., 2006, 2008](#)) to measure the expression levels of multiple genes simultaneously, thereby determining each cell's endpoint state ([Figure 1E](#), ii–v).

### Kin Correlation Analysis Validation by Comparing Inferred Two-State Switching Dynamics with Direct Time-Lapse Analysis

To experimentally apply KCA, we proceed in two stages. First, we validate the method by analyzing switching between two distinct states of *Esrrb* expression in mouse ES cells. Second,

### Box 1. Kin-Correlation Analysis: Dynamics Can Be Inferred from Correlation Functions of Cellular States on Pedigrees

In this Box, we explain the KCA framework, which enables inference of cell-state transition rates from the degree of clustering of cell states on pedigrees. We rely on the following definitions:

**Lineage distance,  $u$ :** The number of generations back to the common ancestor of two cells.  $u = 1$  for sisters,  $u = 2$  for first cousins, etc.

**Transition matrix,  $\mathbf{T}$ :** A square  $N \times N$  matrix, where  $N$  denotes the number of cell states, whose  $l, j$ th element is the probability per cell cycle of a cell transitioning from state  $J$  to state  $l$ ,  $T(l|J)$ . Each column of this matrix sums to 1.

**Reversible dynamics:** The dynamics described by a transition matrix is reversible if for any pair of states  $A$  and  $B$ , the number of cells transitioning from  $A$  to  $B$  per unit time is equal to the number transitioning from  $B$  to  $A$ .

**Two-cell correlation functions,  $\mathbf{C}(u)$ :** An  $N \times N$  matrix, for each value of  $u$ , whose  $l, j$ th element denotes the frequency of observing a pair of cells at lineage distance  $u$  in states  $l$  and  $j$ .

**Three-cell correlation functions,  $\mathbf{C}(u, v)$ :** An  $N \times N \times N$  matrix that is a function of the two lineage distances  $u$  and  $v$ , which describe the degree of relatedness of three cells.  $u$  is the number of generations to the common ancestor of the two more closely related cells, while  $v$  specifies the number of generations to the common ancestor of all three cells.  $C_{ljk}(u, v)$  denotes the frequency of observing the more distant relative in state  $l$  and the two more closely related cells in states  $j$  and  $k$ . Note that  $C_{ljk} = C_{ikj}$ .

Here, our goal is to show how the transition matrix  $\mathbf{T}$  can be inferred from the experimentally observable cell state correlation functions,  $\mathbf{C}(u)$  or  $\mathbf{C}(u, v)$ . We first derive the equations for the case where all cell states are equally likely and the dynamics is reversible (or equivalently when  $\mathbf{T}$  is symmetric) and then treat the more general case briefly here and in more detail in the [STAR Methods](#). First, we compute the expected two-cell correlation function for a given transition matrix. Two cells at lineage distance  $u$ , shared a common ancestor in an unknown state  $M$ ,  $u$  generations back. Subsequently, they each experienced  $u$  divisions and, potentially, zero or more state transitions independently of one another. Given the transition matrix for one generation,  $\mathbf{T}$ , we can compute the resulting transition matrix for  $u$  generations by taking  $\mathbf{T}$  to the  $u$ th power:  $T^u(l|M)$ . It follows that the joint-probability of observing the two cells in states  $l$  and  $j$  is given by:

$$C_{lj}(u) = \frac{1}{N} \sum_M T^u(l|M) T^u(j|M) = \frac{1}{N} \sum_M T^u(l|M) T^u(M|j) = \frac{1}{N} T^{2u}(l|j)$$

where the summation is over all possible states  $M$  of the ancestor. Here, by assumption, each state occurs with probability  $1/N$ . The simplification in the last step follows because  $\mathbf{T}$  is symmetric.

To infer the dynamics, we work backward to recover matrix  $\mathbf{T}$  by computing  $\mathbf{T}_{inferred}(u) = \mathbf{C}(u)^{1/(2u)}$ . For reversible dynamics, the transition matrix can be fully recovered by simply considering the two-cell correlation functions.

If the occurrence probability of the states is not a constant, we need to modify the equation for  $\mathbf{T}_{inferred}(u)$ . Assume that a given state  $l$  is observed in the population with frequency  $p_l$ . The condition of reversibility requires that for any given pair of states, the forward and reverse fluxes must be equal:  $T(l|M)p_M = T(M|l)p_l$ . The two-cell correlation matrix is now given by,

$$C_{lj}(u) = p_j \sum_M T^u(l|M) T^u(M|j) = p_j T^{2u}(l|j)$$

To infer  $\mathbf{T}$ , above equation can be rearranged to express the transition matrix in terms of the correlation matrix, by first defining a rescaled correlation matrix,  $\tilde{C}_{lj}(u) = p_j^{-1} C_{lj}(u)$ . It then follows that, as in the simpler case, the transition matrix can be recovered by taking the appropriate root of the matrix  $\tilde{\mathbf{C}}$ ,  $\mathbf{T}_{inferred}(u) = \tilde{\mathbf{C}}(u)^{1/(2u)}$ .

Finally, for irreversible dynamics,  $\mathbf{T}$  cannot be recovered from  $\mathbf{C}$  directly because the assumption that  $T(l|M)p_M = T(M|l)p_l$ , no longer holds. Intuitively, the two-cell correlations are not sufficient, because they do not provide information about the directionality of state transitions. However, with a triplet of cells, the state of the ancestor of a cell pair is reflected in the state of its more distant relative. As a result, three-cell correlations do permit inference of directionality. The expected three-cell correlation functions can also be computed from the transition matrix  $\mathbf{T}$ :

$$C_{ljk}(u, v) = \frac{1}{N} \sum_M \left( \sum_S T^u(k|S) T^u(j|S) T^{v-u}(S|M) \right) T^v(l|M),$$

where  $S$  is summed over all possible states of the common ancestor of the two more closely related cells, and  $M$  is summed over all possible states of the common ancestor of all three cells. In the [STAR Methods](#), we describe the full procedure for using three-cell correlations to infer  $\mathbf{T}$  for irreversible dynamics.

(Continued on next page)

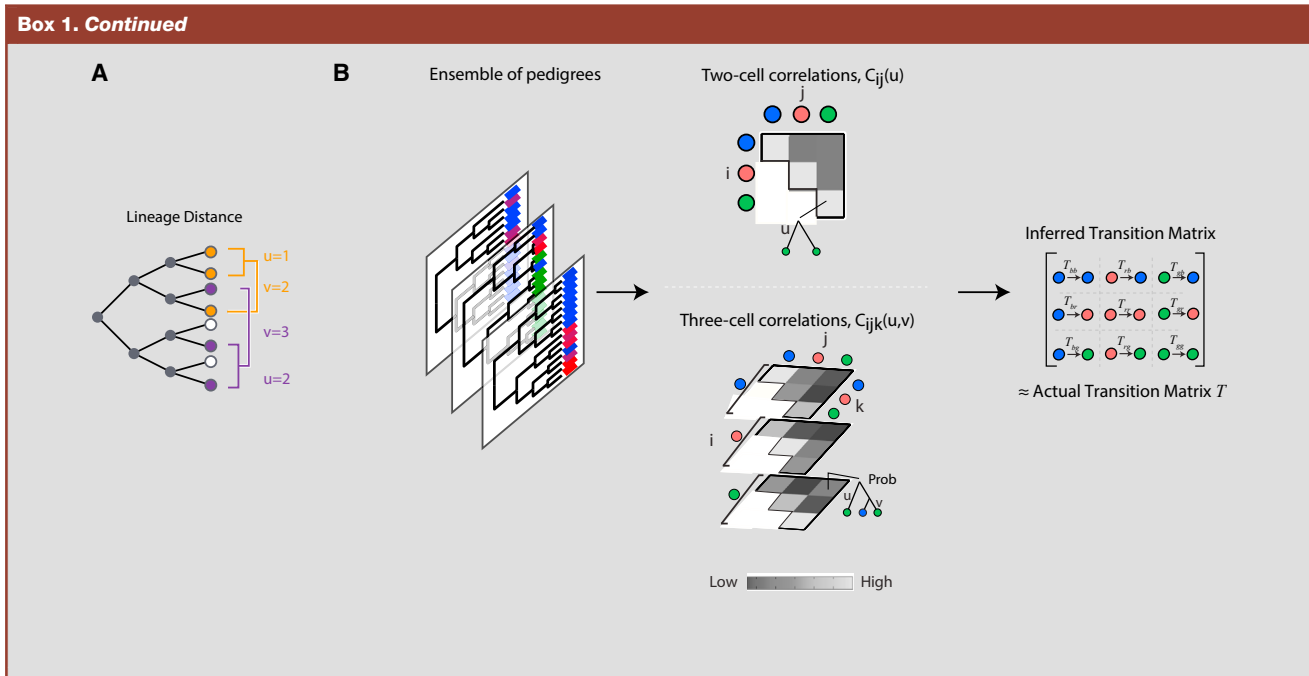

we broaden the analysis to determine the transition dynamics of a larger set of ES cell states.

*Esrrb* is a transcription factor central to maintaining the naive pluripotent state, and it plays a critical role in the core pluripotency network (Festuccia et al., 2012; Martello et al., 2012; Singer et al., 2014; van den Berg et al., 2008). *Esrrb* upregulation has also been shown to facilitate fibroblast reprogramming to the induced pluripotent state (Feng et al., 2009). Most importantly here, *Esrrb* expression in LIF+Serum culture conditions is bimodal, with cells switching between high and low expression states (Singer et al., 2014).

We constructed a knock-in fluorescent reporter for *Esrrb* expression (Figure 2A) and validated the reporter using smFISH (Figures S2A and S2B). We acquired time-lapse movies (Figure 2Bi), using custom software to track individual cells over time and establish the pedigrees (lineage trees) of individual colonies (see the STAR Methods). At the end of movie (~48 hr), we fixed the cells and acquired smFISH measurements of *Esrrb* expression (Figure 2B, ii–iii). Finally, we combined the measurements, assigning smFISH *Esrrb* expression levels at the last time point to the corresponding leaves of the tree (Figure 2Di). Altogether, we analyzed 14 trees (299 cells).

Consistent with previous results, *Esrrb* exhibited a bimodal distribution of mRNA copy number by smFISH (Figure 2C) (Kumar et al., 2014; Singer et al., 2014). To understand this distribution, we first note that a single state is expected to generate a distribution of mRNA copy numbers in individual cells, due to the stochastic, “bursty” nature of transcription and mRNA degradation, as shown previously (Elowitz et al., 2002; Friedman et al., 2006; Ozbudak et al., 2002; Peccoud and Ycart, 1995; Suter et al., 2011). For many genes and cell types, the distribution of mRNA copy number is well-fit by a negative binomial distribution (Friedman et al., 2006; Raj et al., 2006). This distribution

is generated when there is a constant probability per unit time of initiating a transcriptional burst, and the number of mRNAs produced per burst follows an exponential distribution. For a gene with two expression states, we expect each state to generate a negative binomial distribution of mRNA with different burst rate and burst size parameters. These two distributions will, in general, overlap. Thus, the bimodal distribution can be explained as a linear combination of two negative binomial distributions, one for each expression state.

We fit the observed *Esrrb* distribution to a linear combination of two negative binomial distributions. Using this fit, we assigned each cell a probability of being in either the high or low *Esrrb* expression state given its observed transcript count (see the STAR Methods). Thus, we obtained a probabilistic endpoint state assignment for each cell on each pedigree (Figure 2Di). Because of the overlap between the transcript count distributions of the two *Esrrb* states, many cells have approximately equal probability of being in either state. The KCA framework is compatible with these probabilistic state assignments. When computing the correlation matrix (Box 1), we account for probabilistic state assignments by summing over all possible pairs of states, for each pair of cells, weighting each state pair by its relative probability. When the state assignments are more ambiguous, a larger number of observations (pedigrees) is required to ensure accurate inference of transition rates (see the STAR Methods for details).

To infer the rates at which cells switch between *Esrrb* states, we analyzed these trees with KCA. We first computed pair correlation matrices for lineage distances  $u$ , ranging from 1 to 4 (Figure 2Dii). As expected, the frequency of observing two cells in the same *Esrrb* state decreased with increasing lineage distance. Next, using KCA, we computed the switching rates that would give rise to the observed correlation matrices. For stationary

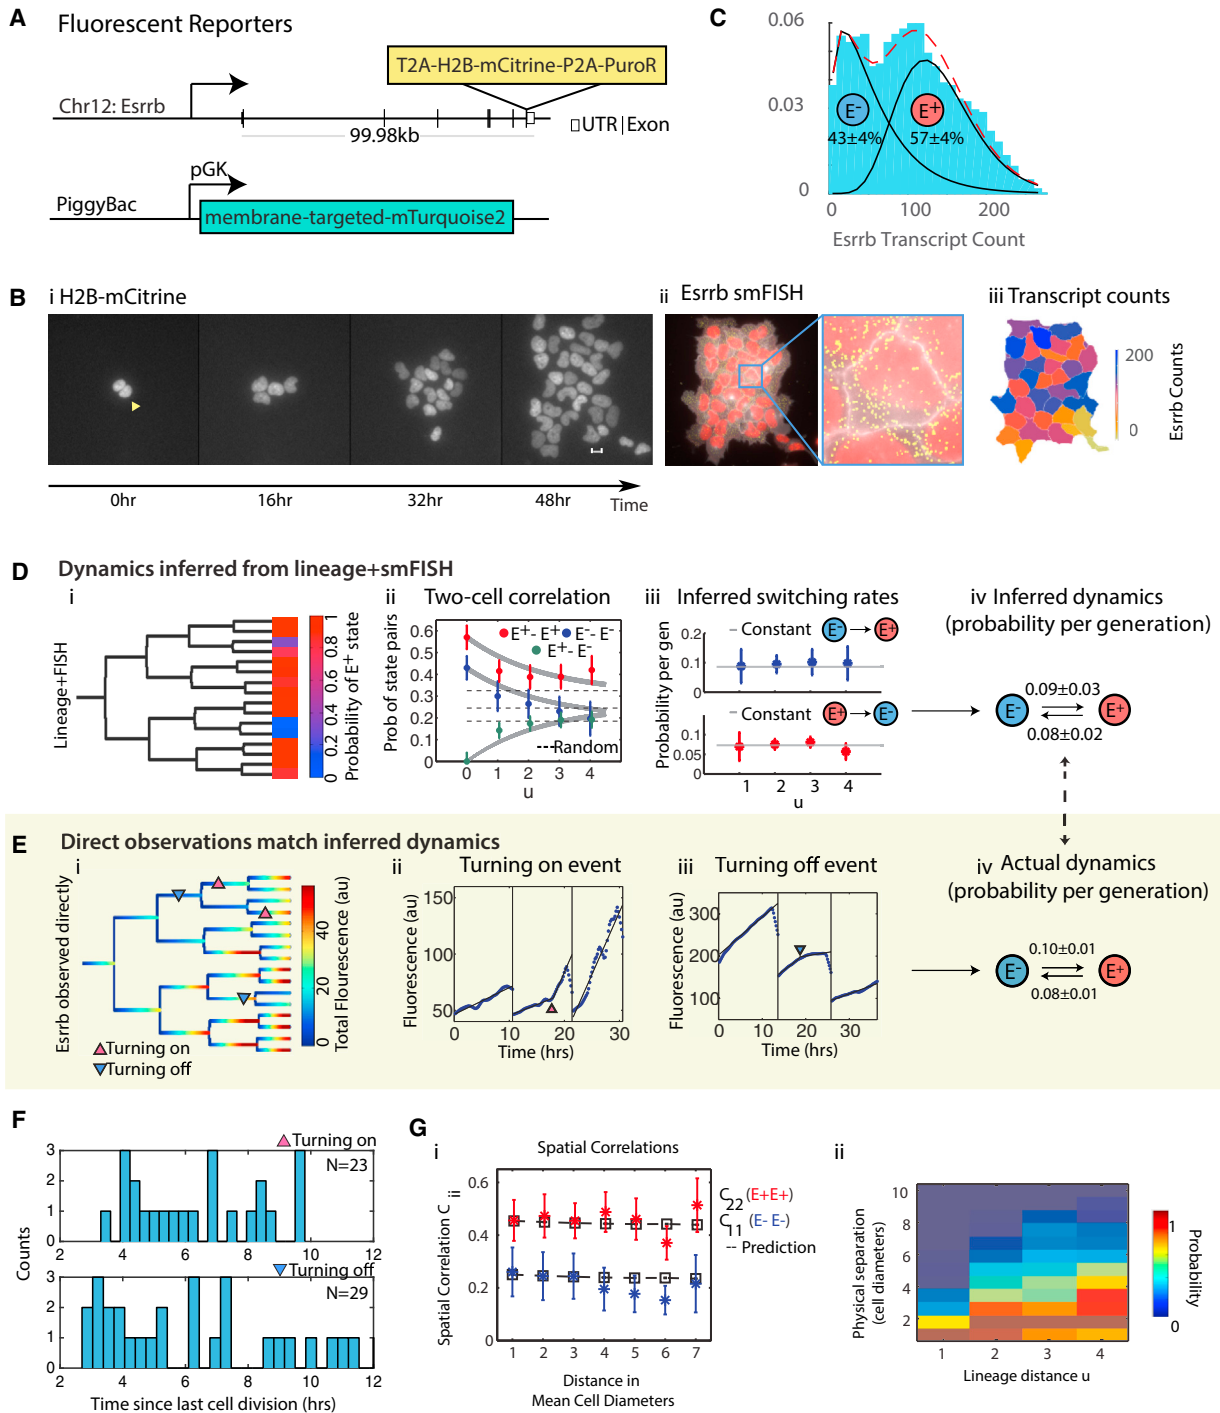

**Figure 2. Inference and Direct Validation of *Esrrb* Dynamics**

(A) The *Esrrb*-H2B-mCitrine knock-in reporter (top) and PiggyBac integration construct for a palmitoylated-mTurquoise2 (bottom).

(B) (i) An example time-lapse movie showing H2B-mCitrine fluorescence in a proliferating colony of ES cells. Arrow indicates root cell in (E). Scale bar, 10  $\mu$ m. (ii) A composite image of the membrane-mTurquoise2 (white), DAPI (red), and *Esrrb* transcripts by smFISH (yellow dots). (iii) Heatmap showing *Esrrb* transcript counts for each cell in this colony.

(C) The distribution of *Esrrb* transcript counts can be fit by a linear combination of two negative binomial distributions (solid lines), with indicated population fractions (percentages).

(D) (i) Lineage tree (pedigree) from example movie shown in (B). State assignments on leaves indicate the probability that the cells are in the  $E^+$  state (see the STAR Methods). (ii) The probability of observing a pair of cells both in the  $E^+$  state (red), both in the  $E^-$  state (blue), and as a mixed  $E^+E^-$  pair (green), as a function of degree of relatedness of the two cells,  $u$ . Cell-state transition rates were computed from the observed correlation functions for each value of  $u$ . Error bars are SD

(legend continued on next page)

Markovian dynamics, these rates should not depend on the lineage distance from which the correlation matrix is computed (Box 1). The inferred rate of switching from the *Esrrb* low state to the *Esrrb* high state was  $0.09 \pm 0.03$  per cell cycle (errors are the SD as estimated by bootstrap, see the STAR Methods). The reverse rate was  $0.08 \pm 0.02$ , per cell cycle. These rates remained constant across lineage distances of  $u = 1$  to 4, consistent with stationary Markovian dynamics (Figure 2D, iii–iv). We note that the constant inferred rates imply an exponential waiting time between state transitions, a property of Markovian dynamics.

To independently validate these inferred *Esrrb* switching dynamics, we next analyzed data from the *Esrrb* knock-in fluorescent reporter. We extracted the total fluorescence from each cell over the duration of the movies. Because the H2B-mCitrine is stable, its abundance diminishes only through dilution during cellular division events. These dilution events correspond to approximately halvings of the fluorescent readout from each cell across cell divisions, as evident in the saw-tooth pattern of the traces shown in Figure 2E, ii and iii. We therefore focused on the “promoter activity,” or the rate of accumulation of total fluorescence (slope of the fluorescence traces shown in Figure 2E, ii and iii), which should be proportional to the abundance of mRNA in the cell at any given time (Singer et al., 2014). Indeed, the *Esrrb* production rate in the final cell cycle of the movie was strongly correlated with *Esrrb* transcript counts measured at the end of the movie, but not with that of  $\beta$ -actin, a homogeneously expressed housekeeping gene (Figure S2B), providing an internal validation of both readouts.

To classify *Esrrb* promoter activity as either high or low, we implemented a threshold on production rate at each time point throughout the cells’ lineage history (Figure 2Ei). Cell-state transitions were defined as a change in the promoter activity across the threshold that persisted for at least one cell cycle (see the STAR Methods). Examples of transitions can be observed in plots of total fluorescence trajectories, as shown in Figure 2E, ii and iii. Transitions from *Esrrb* low to high states, or high to low states, occurred with rates of  $0.10 \pm 0.01$  and  $0.08 \pm 0.01$  per cell cycle, respectively (Figure 2Eiv), consistent with the values inferred by KCA above (errors are the uncertainty in the observed frequencies due to finite number of observations). Finally, although this has no bearing on using KCA for inferring the transition rates, we also checked whether state transitions were more likely to occur at one particular point of the cell cycle. However, analysis revealed no strong cell-cycle dependence in

these data (Figure 2F). Together, these results suggest that the KCA method can correctly infer the reversible state switching dynamics of *Esrrb*, which appear to be consistent with a constant switching rate per unit time.

### Transition Rates Cannot Be Explained by Local Intercellular Signaling

One potential effect neglected in this cell-autonomous analysis is that neighboring cells could interact through a variety of signaling pathways, potentially impacting cell-state changes in a non-cell-autonomous fashion. To test whether such effects play a significant role in the observed *Esrrb* transition rates, we computed the correlation of the *Esrrb* state for pairs of cells as a function of their spatial separation distance in the colony (Figure 2Gi). This is possible because in situ single-molecule RNA-FISH measurements of cell state do not disrupt the spatial context of individual cells. We observed little cell-state correlation in space, mainly because the ES cells migrated frequently from one part of the colony to another (Figure 2Gii), as evident in our time-lapse movies (Movie S1). Nevertheless, because closely related cells are more likely to be located closer to each other in space and also share the same state as their common ancestor, we expect some degree of cell-state correlation in space from shared lineage history alone. To quantify this effect, we calculated the expected correlation of *Esrrb* state as a function of spatial separation distance from the inferred switching rates of *Esrrb* and the observed pedigrees (see the STAR Methods). This correlation fully explained the observed spatial correlations (Figure 2Gi), suggesting that, while local signaling interactions can and likely do occur, they are not required to explain the observed cell-state transition dynamics in these conditions.

### Characterization of ES Cell States

Having established the inference framework and demonstrated its application experimentally, we set out to identify other ES cell states whose transitions could also be analyzed. In accordance with previous work (Falco et al., 2007; Ivanova et al., 2006; Lu et al., 2011; Macfarlan et al., 2012; Niwa et al., 2009; Singer et al., 2014; Singh et al., 2007; Toyooka et al., 2008; Weidgang et al., 2013; Zalzman et al., 2010), we selected *Esrrb*, *Tbx3*, and *Zscan4* as potential cell state markers. To better characterize their expression distributions, we simultaneously measured the mRNA copy number of *Esrrb*, *Tbx3*, and *Zscan4*, in single ES cells using three-color smFISH. While RNA sequencing (RNA-seq) enables classification of states by

determined by bootstrap. (iii and iv) The probability per cell cycle of transitioning from E– to E+ (blue) and from E+ to E– (red). Error bars were obtained by bootstrap (see the STAR Methods). Inferred rates are (within statistical error) independent of  $u$ , consistent with stationary Markovian dynamics.

(E) (i–iii) The same pedigree as in (D) with branches displaying accumulation of mCitrine fluorescence in each cell cycle. Arrows indicate a significant, heritable change in the rate of fluorescence accumulation, corresponding to switches between *Esrrb* states. (iv) *Esrrb* cell-state transition rates measured from switching events in the time-lapse movies are consistent with inferred rates.

(F) Histogram of the time of occurrence of state transitions (on-events, top panel; off-events, bottom panel) along the cell cycle in units of hours since the last cell division.

(G) (i) Empirically determined frequency of finding a pair of cells both *Esrrb* high (red points) or *Esrrb* low (blue points) as a function of their physical separation distance,  $d$ , in the colony (in units of average cell diameters). Error bars are SD determined by bootstrap (299 cells, 14 colonies). Dashed lines indicate expected cell state correlation as function of spatial separation distance. The observed spatial correlations are consistent with the correlations expected from shared lineage alone. (ii) Spatial separation distance correlates weakly with lineage distance  $u$ . The distribution for each value of  $u$  is independently normalized to peak at 1.



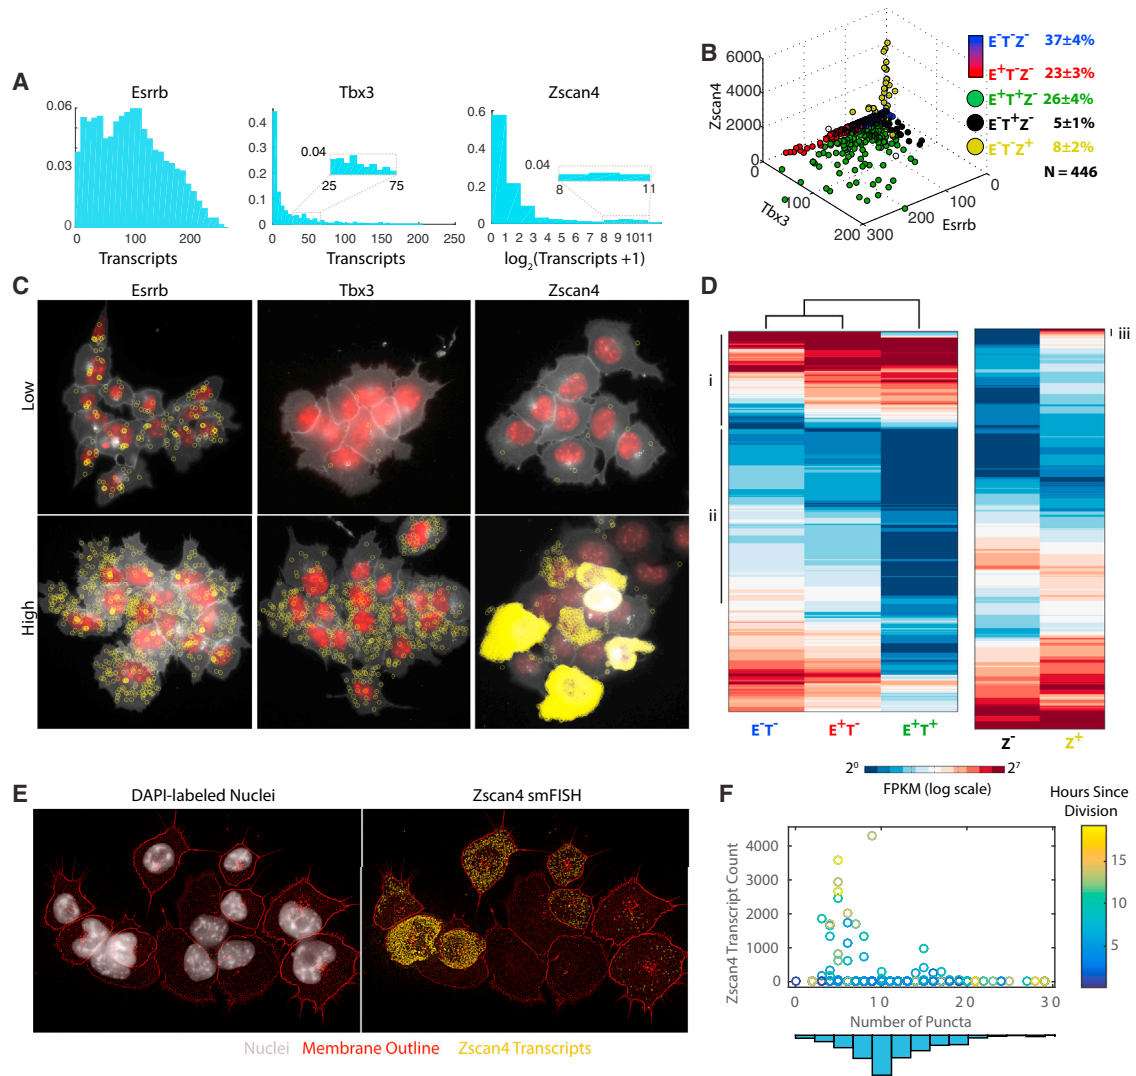

### Figure 3. Characterizing a Set of Mouse Embryonic Stem Cell States

(A) Distribution of the transcript counts of *Esrrb*, *Tbx3*, and *Zscan4* in single cells as determined by smFISH.

(B) Scatterplot of transcript counts by smFISH in 446 cells (individual dots). Color coding indicates assignment of each cell to one of five states. Blue-red gradations indicate probabilistic assignment of *Esrrb* expression states.

(C) Example colonies showing groups of related cells in the same expression state for each of the three marker genes (for either the low or high state), consistent with cell states that persist over multiple generations. Yellow circles indicate transcripts detected by smFISH; red indicates DAPI stained nuclei; white is palmitoylated-mTurquoise2 demarcating cell membranes.

(D) Sub-populations sorted on indicated marker genes (below columns) exhibit distinct RNA-seq profiles and broad differences in gene expression. Fluorescence-activated cell sorting (FACS) was performed based on distinguishable fluorescent reporter genes integrated at *Esrrb* and *Tbx3* loci in the same cell (Figure S2C), or, separately, based on a *Zscan4* reporter integrated by PiggyBac transposition (right). Only genes showing statistically significant differential expression for the same cell line between sorted subpopulations are shown.

(E) *Zscan4*<sup>+</sup> cells exhibit a distinctive nuclear morphology compared to *Zscan4*<sup>-</sup> cells. DAPI stained nuclei (white, left); *Zscan4* smFISH dots (yellow, right); membrane boundaries (red).

(F) Nuclear morphology correlates with *Zscan4* expression level (Pearson correlation coefficient = -0.15; p value = 0.002). The number of nuclear puncta detected in each cell plotted against the number of *Zscan4* transcripts in the same cell. The color of each dot indicates the time since that cell's last division, as determined by time-lapse microscopy.

high dimensional transcriptional profiles, smFISH yields a higher resolution of quantitative, amplification-free measurements albeit with lower dimensionality, enabling estimation of in situ state assignments from fewer genes. The mRNA copy number distributions of *Tbx3* and *Zscan4* were long-tailed (Figure 3A)

consistent with Kumar et al. (2014) and Zalzman et al. (2010). For these genes, we identified a threshold that optimally separated the mRNA distribution into high and low expression states and ensured that subsequent results were robust to the choice of threshold (see the STAR Methods and Figure S3).

By contrast, *Esrrb* transcript counts exhibited a bimodal distribution, with overlapping modes (Figure 2C). While binary classification of three genes could in principle produce  $2^3 = 8$  possible states, three of these states were rare (<1% of the population) or did not occur and were not considered further (Figure 3B).

Additional experiments supported the notion that these genes marked heritable cell states. First, many or all cells within individual colonies could be observed simultaneously expressing large numbers of transcripts for these genes, suggesting that their expression states are inherited across cell divisions. Conversely, whole colonies could also be observed expressing little to none of these transcripts (Figure 3C). Second, gene expression analysis of sorted sub-populations exhibited broad differences in gene expression profiles. Using a double knock-in reporter for *Esrrb* and *Tbx3* (Figure S2C) and a separate line with a PiggyBac promoter fragment reporter for *Zscan4* (see the STAR Methods), we sorted out *Esrrb/Tbx3* negative (E–T–), *Esrrb*-positive/*Tbx3*-negative (E+T–), and *Esrrb/Tbx3* positive (E+T+) cells, as well as *Zscan4*-positive (Z+) and *Zscan4*-negative (Z–) cells, and performed RNA-seq on each sample. We observed hundreds of genes that were differentially expressed between these states (Figure 3D), indicating that variations in marker gene expression do not simply reflect intrinsic noise or fluctuations in the expression of individual genes, but rather indicate broad transcriptional changes. In particular, we observed decreasing expression levels of differentiation makers and signaling factors when going from E–T–, to E+T–, and finally to E+T+ cells, suggesting that *Tbx3* could mark a more pluripotent state. Accordingly, *Zscan4*-positive cells displayed a unique nuclear morphology by DAPI-stain compared with *Zscan4*-negative cells: while *Zscan4*-negative cells appeared to have a larger number of distinct puncta, *Zscan4*-positive cells exhibited fewer but larger puncta (Figures 3E and 3F), potentially suggesting aggregation of presumed heterochromatin. This result further supports the notion that *Zscan4*-positive cells represent a distinct phenotypic state. Taken together, these results show that these three markers define heritable cell states with distinct gene expression profiles across multiple genes.

### Cell-State Transitions Are Restricted

We set out to determine the transition dynamics of these states using KCA. We acquired ~48 hr movies, after which cells were fixed and stained for *Esrrb*, *Tbx3*, and *Zscan4* mRNA in the same cells (Figures 4A and 4B) (see the STAR Methods). Based on expression, we assigned each cell to one of the five states described above (Figure 3C). Altogether, we analyzed 41 pedigrees with a depth of  $4.0 \pm 0.5$  generations (mean  $\pm$  SD) (see Figure 4D for examples and Figure S4 for all trees).

Inspection of these trees revealed cell-state clustering, with closely related cells (e.g., sisters, first cousins) predominantly observed in the same state, implying that most states persist over multiple generations. In particular, *Tbx3* and especially *Zscan4* were expressed infrequently (population fractions of 31% and 8% respectively), but, once expressed, were typically observed to be “on” in clades of two to eight cells, consistent with extended (multi-generational) periods of expression. For this reason, their long-tail mRNA distributions do not appear to represent brief stochastic bursts, as

was previously hypothesized (Singer et al., 2014). At the same time, most colonies contained cells in different states, demonstrating state-switching typically occurs multiple times in each colony during the movies. Notably, certain state combinations were more likely to be found together in the same pedigree. For example, the E–T–Z+ state was frequently found in the same pedigree with the E+T+Z– state but almost never with the E+T–Z– state (Figure S4). Together, these results indicate that the 48-hr timescale studied here can capture many transition events in ES cells, making the system amenable to analysis by KCA.

### Mouse Embryonic Stem Cells Exhibit a Chain-like State Transition Network

To extract the quantitative transition rates, we first computed the two-cell correlation matrices, which are plotted for sister cell pairs in Figure 4Ei and for more distantly related cell pairs in Figure S5A. From these correlations, we inferred the full set of transition rates between the five states using KCA (Figure 4Eii). These rates had two notable features: first, most states were stable over timescales of multiple cell cycles; all but one of the states showed an inferred half-life of ~6 generations. The exception was E–T+Z–, whose expected half-life is only ~1.7 generations. Second, many potential transitions occur at negligible rates (within the statistical error), suggesting they are either disallowed or extremely infrequent (Figure 4Eii). Some of the negligible, but non-zero, rates could reflect ambiguities in state assignment when cell transitions from E–T+Z– to E–T–Z+ state are captured after deactivating *Tbx3* but before activating *Zscan4*, or vice versa.

From this analysis, the full network of potential transitions effectively reduces to a linear chain, in which cells transition stochastically and reversibly only between adjacent states (Figure 4F). Cells traverse this chain by performing a random walk, hopping between adjacent states, but on average not moving in any particular direction. In the Discussion, we describe some implications of the chain-like cell-state transition network in ES cells. For now, we note that the chain-like organization of states constrains the dynamic trajectories of ES cells. For example, it implies that transitions between 2C-like (Falco et al., 2007; Macfarlan et al., 2012) and epiblast-like states (Toyooka et al., 2008) pass through a specific set of long-lived intermediate states. Thus, to activate *Tbx3* starting in the E–T–Z– state, cells must transition to the *Esrrb* high state first (E+T–Z–). Similarly, E–T–Z– cells must transition through the E+T+Z– state to reach the *Zscan4* high state (E–T–Z+). The chain-like transition network also makes the prediction, which we validated directly and independently (see the STAR Methods), that during the transition from E+T+Z– to E–T–Z+, *Esrrb* and *Tbx3* should turn off almost simultaneously, closely followed by *Zscan4* activation, over a timescale comparable to the duration of a cell cycle. For validation of the inferred dynamics, see the STAR Methods.

### Self-Consistency Checks for Applying KCA to Other Systems

Thus far, we have considered systems governed by cell-autonomous, time-independent, Markovian dynamics, in which sister cell transitions are independent of one another. However, many

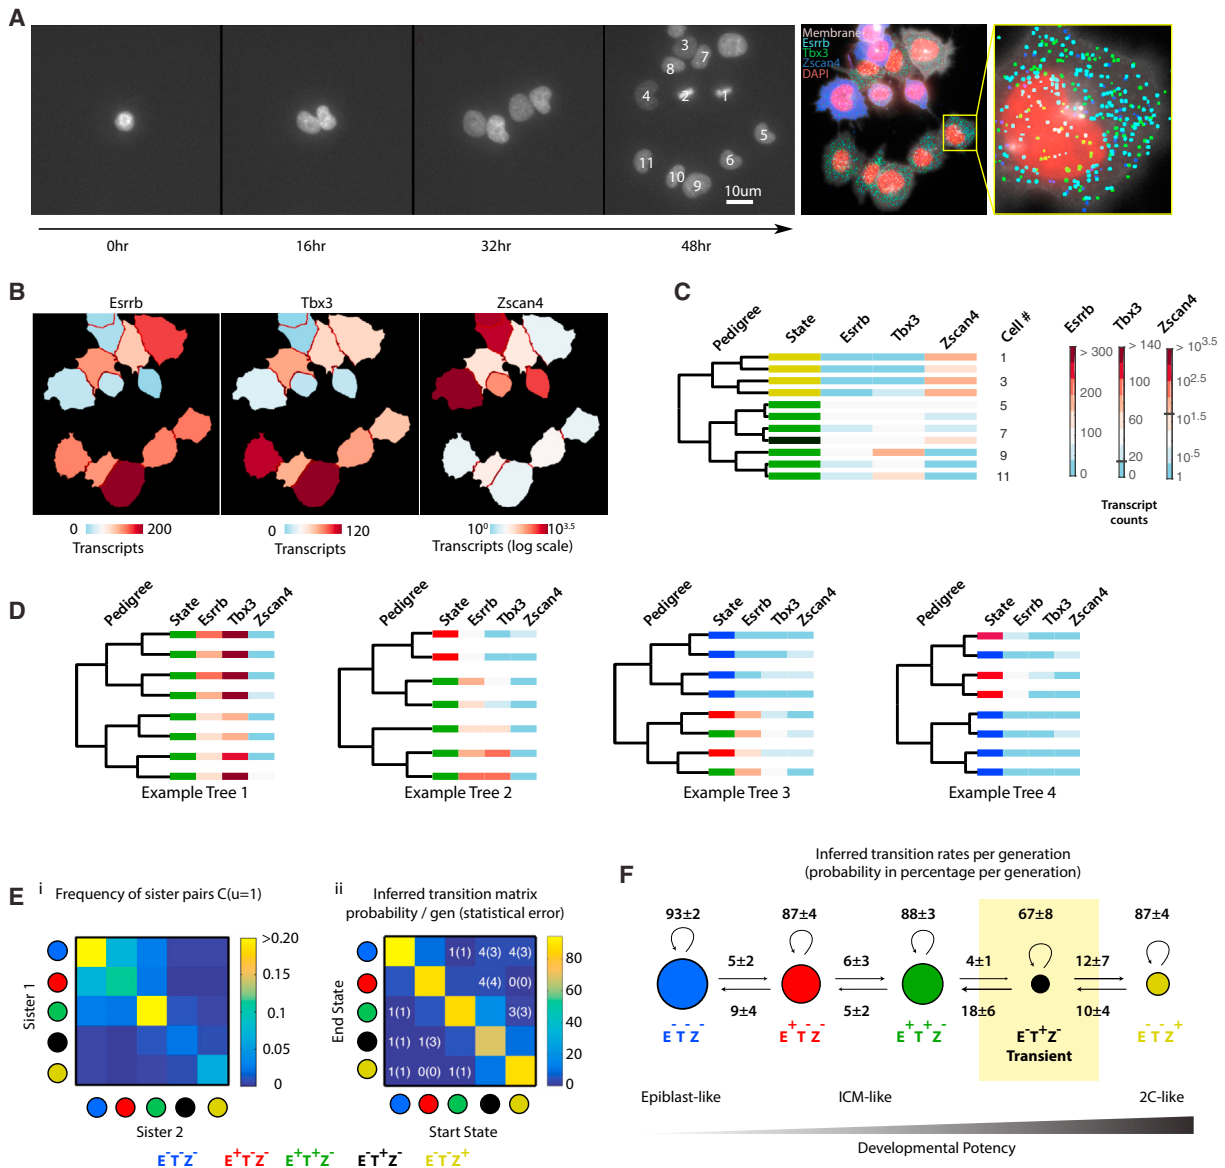

**Figure 4. State-Switching Dynamics within a Pluripotency Network**

(A) Left: time-lapse movie used only for tracking cells to determine pedigrees. Right: in the same cells, smFISH for *Esrrb* (cyan dots), *Tbx3* (green dots), and *Zscan4* (blue dots), as well as membrane-mTurquoise2 (white) and DAPI (red).

(B) Segmented cells are color-coded by transcript count for each gene analyzed.

(C) Pedigree reconstructed from cells tracked in (A) are plotted as a dendrogram, with state assignments and transcript counts for each of the three genes at the leaves.

(D) Examples of other pedigrees and state assignments (see Figure S4 for complete set).

(E) (i) Frequency of observation of each pair of states in sister cells (two-cell correlations). See Figure S5A for other lineage distances. (ii) Using KCA, the transition rate matrix was computed from correlation matrices (see Box 1).

(F) Inferred cell-state transition network shows chain-like dynamics.

Statistical errors are SD determined by bootstrap (see STAR Methods).

systems of biological interest may violate one or more of these conditions. A useful feature of KCA is the redundancy of different correlation measurements, which can be used to self-consistently check that these necessary conditions are satisfied in any particular system. Here, we consider several different potential violations and how they could be detected.

Some systems may exhibit non-Markovian dynamics, either because of “hidden” states, or because of “timed” transitions, in which cells spend a fixed amount of time or number of generations in a given state rather than exiting the state at a fixed stochastic rate (Norman et al., 2013). One way to detect such effects is to consider the effective transition rates,  $\tilde{T}(u) \sim C^{(1/2u)}(u)$ .

## Deviations from simple dynamics

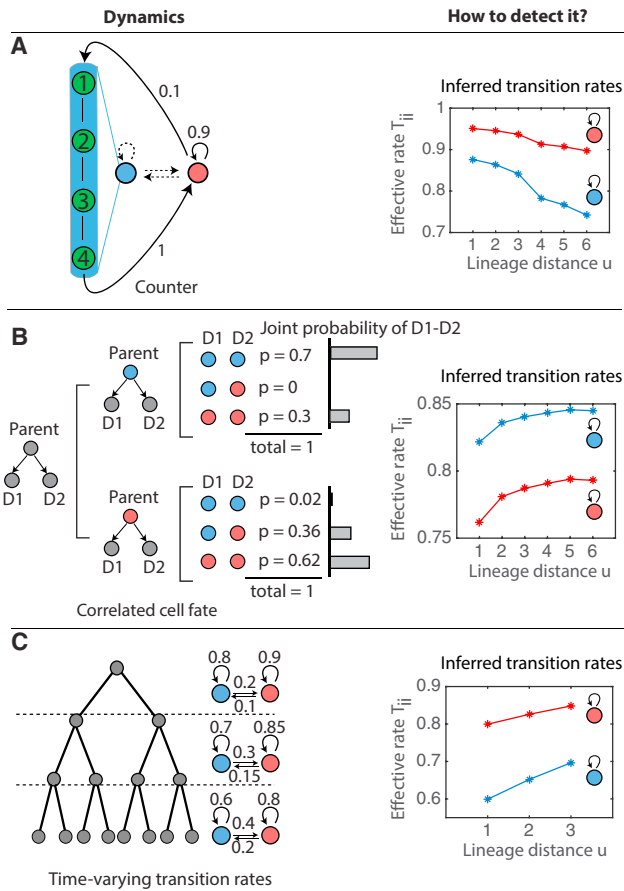

**Figure 5. Detecting Deviations from Simple Dynamics Using Self-Consistency Checks**

(A) “Hidden” states can produce apparent non-Markovian dynamics. In this example, the blue state is actually composed of multiple distinct states (labeled 1–4), which are not separately identifiable. The blue state is thus a counter that persists for exactly four generations. KCA applied to the apparent two-state system generates inferred persistence rates which change systematically with lineage distance,  $u$ , especially near  $u = 4$ , causing the inferred transition rates (right) to depend on lineage distance. Transition rates are indicated on arrows.

(B) Deviation from simple dynamics resulting from correlated transitions. In this example, distinct division patterns are indicated with corresponding probabilities,  $p$ . Values were chosen such that the joint probability of observing a pair of sister cells in a pair of states conditional on the state of their parent is not equal to the product of their marginal probabilities. In this case, inferred transition rates depend on lineage distance (right).

(C) When transition rates vary with time (left), the inferred transition rates vary with lineage distance (right). In this example, this effect can be used to infer the time-varying transition rates (see the [STAR Methods](#)).

Without hidden states, these rates are independent of the lineage distance,  $u$ , but with hidden states, they depend on  $u$ , as shown in [Figure 5A](#). Comparing effective transition rates determined at different lineage distances can thus be used to identify the existence of one or more hidden states or timers.

Some systems, such as somatic stem cells in cycling tissues ([Clayton et al., 2007](#); [Snippert et al., 2010](#)), exhibit correlated

fate decisions in sister cells. Such correlations produce a deviation of the effective transition rates from a constant, particularly at lower values of  $u$ , where the correlations between the fates of sisters exhibit the largest effects ([Figure 5B](#)). If it is already known that decisions are controlled through a specific class of models, as in [Klein and Simons \(2011\)](#) and [Lopez-Garcia et al. \(2010\)](#), then this information may still be sufficient to infer the joint probability of sister fates conditional on the state of their parent (assuming other requirements of the method are met) ([Hormoz et al., 2015](#)). At the very least, this deviation can reveal that some assumption of the method is not satisfied.

Another potential issue is the possibility of time-dependent transition rates. This would lead to the inference of different effective transition rates from the two cell-correlation functions at different lineage distances,  $u$ . In principle, it is possible to infer time-dependent transition rates through measurement of two-cell correlations at all values of  $u$ . Finally, we note that three other potential deviations from simple Markovian dynamics were previously discussed above: irreversible transitions ([Figure S1C](#)), non-stationary dynamics ([Figure S1D](#)), and effects of local cell signaling ([Figure 2G](#)).

To summarize, the KCA framework relies on measurement of the two-cell, three-cell, and potentially higher-order correlation functions at various lineage distances. Because the inference approach under-fits the measured correlation functions, the redundancy can be used to validate the assumptions of the model used for the inference through self-consistency checks. If this validation fails, the model can be extended to include additional factors, such as spatial signaling or correlated sister fates, and the process can be repeated.

## DISCUSSION

Although cell-state transitions are central to biology, methods to measure their rates without cell line engineering, perturbations, or sorting have been lacking. The KCA approach implemented here with time-lapse movies and endpoint smFISH provides such a method.

Applying KCA to ES cells, we discovered a transition network consisting of a set of reversible transitions along a linear chain of metastable states ([Figure 4F](#)). These states are ordered in a sequence from 2C-like (totipotency) to the more differentiated epiblast-like state. Cells traverse this chain through stochastic reversible transitions, and pluripotency is therefore gained and lost by ES cells in a stepwise incremental way rather than continuously or all at once. The highly structured chain-like transition network dynamics discovered here contrasts with one prevailing view of ES cell heterogeneity as a noisy process consisting of random transitions among all states, as well as views in which it reflects independent noise in various genes. It also contrasts with the canonical binary unidirectional trees observed in many classic developmental systems. Moreover, because all transitions are reversible, this system can be accurately represented by a one-dimensional energy landscape, in which each state can be characterized as a local minimum, and transitions can be thought of as stochastic hops to neighboring states along a reaction coordinate ([Waddington, 1940](#); [Sokolik et al., 2015](#)). The chain-like transition network

could ensure that the ES cell culture is comprised primarily of cells whose recent ancestors were in the E–T–Z+ state, where telomere length may be extended (Zalzman et al., 2010), potentially enhancing the viability of the culture (see the STAR Methods and Figure S7).

The transition dynamics of ES cells appear consistent with a “memory-less” Markov process, where transition rates depend only on the current state. Knowledge of these transition rates allows us to estimate the timescales required for colonies to reach an equilibrium distribution of cell states. Based on the measured rates, it should take ~25 generations for a single-starting ES cell to yield an approximately equilibrium distribution of cell states. For smaller colonies, however, inter-colony variation is expected to dominate intra-colony variation. These considerations could help explain incomplete penetrance in directed differentiation protocols (Ieda et al., 2010; Suzuki et al., 2013; Vo and Daley, 2015) and reprogramming (Buganim et al., 2012; Hanna et al., 2009; Smith et al., 2010).

While powerful, KCA also has limitations. First, and most fundamentally, it applies only to transitions that occur at rates comparable to or slower than the cell cycle, because transitions that occur more rapidly leave no signature in the clustering of states on pedigrees. It is thus well-adapted to developmental and immunological processes but not well suited to analyze more rapid or transient physiological responses. Second, as with phylogenetic reconstruction, we can estimate the likelihood of a particular series of switching events on a given tree, but we cannot determine the exact histories of specific cells. Third, the technique requires previous identification of a set of distinct states and corresponding marker genes. In the case of ES cells, inclusion of additional genes could reveal other states that might have been missed here (Klein et al., 2015; Kumar et al., 2014; Sasagawa et al., 2013). In this regard, emerging in situ single-cell transcriptomic techniques (Chen et al., 2015; Crosetto et al., 2015; Lubeck and Cai, 2012; Lubeck et al., 2014) are exciting, as they dramatically expand the number of genes that can be analyzed in the endpoint FISH-based measurement, enabling high-dimensional gene expression information with reduced a priori selection of genes. While we used thresholds on single genes for discrete state assignment here, such higher dimensional data could be used with the KCA framework to infer transition dynamics among a more continuous range of states, given a sufficient number of observations. Looking forward, the ability to quantify cell-state transition networks should enable analysis of the effects of genetic perturbations on particular transition rates. Finally, we note that KCA can also work with alternative methods for obtaining lineage information (Behjati et al., 2014; Evrony et al., 2015; Jiang et al., 2013; Navin et al., 2011; Zong et al., 2012). Thus, we anticipate that the KCA framework will become more capable and broadly applicable in the future.

## STAR★METHODS

Detailed methods are provided in the online version of this paper and include the following:

- KEY RESOURCES TABLE
- CONTACT FOR REAGENT AND RESOURCE SHARING

## ● EXPERIMENTAL MODEL AND SUBJECT DETAILS

- Cell Line Construction and Tissue Culture

## ● METHOD DETAILS

- Time Lapse Microscopy and Single-Molecule Fluorescence In Situ Hybridization Imaging
- RNA-Seq

## ● QUANTIFICATION AND STATISTICAL ANALYSIS

- Kin Correlation Analysis Applied to Non-uniform Cell State Distributions
- Kin Correlation Analysis Applied to Time-Varying Transition Rates
- Kin Correlation Analysis with Probabilistic State Assignment
- Computing the Three-Cell Correlation Functions for a General Transition Matrix with Irreversible Dynamics
- Simulating KCA for Various Types of Dynamics
- Direct Measurement of Esrrb Switching Dynamics
- Computing the Predicted Spatial Correlation Functions for Esrrb
- Selecting Marker Genes for the ES Pluripotency States
- Assigning Cells to the Pluripotent States
- Inferring the Transition Rates
- Self-Consistency Checks on the Inferred Transition Dynamics
- The Two-State Model of Esrrb Figure 2 Is Consistent with the Inferred Chain-like Model in Figure 4
- Potential Benefits of Chain-like State Transition Networks

## ● DATA AND SOFTWARE AVAILABILITY

## ● ADDITIONAL RESOURCES

## AUTHOR CONTRIBUTIONS

S.H., Z.S.S., and M.B.E. designed experiments. S.H. and Z.S.S. performed experiments and analyzed data. J.M.L. and Z.S.S. constructed cell lines with help from S.H. Y.E.A. developed the movie tracking system. B.I.S. and M.B.E. supervised research. S.H., Z.S.S., and M.B.E. wrote the manuscript with substantial input from all authors.

## SUPPLEMENTAL INFORMATION

Supplemental Information includes seven figures, three tables, and one movie and can be found with this article online at <http://dx.doi.org/10.1016/j.cels.2016.10.015>.

## ACKNOWLEDGMENTS

We thank Jordi Garcia-Ojalvo and David Sprinzak for helpful comments on the manuscript. We thank Fred Tan for construction of the Zscan4 reporter, and members of the M.B.E. Lab for fruitful discussions. This work was supported by the NIH grants R01HD075605A, R01GM086793A, and P50GM068763, Human Frontiers Science Program, grant RGP0020/2012, and in part by the National Science Foundation under grant NSF PHY-1125915. S.H. also acknowledges support from NIH grant K99GM118910. This work is funded by the Gordon and Betty Moore Foundation through grant GBMF2809 to the Caltech Programmable Molecular Technology Initiative.

Received: November 24, 2015

Revised: June 1, 2016

Accepted: October 18, 2016

Published: November 23, 2016

## REFERENCES

- Akiyama, T., Xin, L., Oda, M., Sharov, A.A., Amano, M., Piao, Y., Cadet, J.S., Dudekula, D.B., Qian, Y., Wang, W., et al. (2015). Transient bursts of *Zscan4* expression are accompanied by the rapid derepression of heterochromatin in mouse embryonic stem cells. *DNA Res* 22, 307–318.
- Ahrends, R., Ota, A., Kovary, K.M., Kudo, T., Park, B.O., and Teruel, M.N. (2014). Controlling low rates of cell differentiation through noise and ultrahigh feedback. *Science* 344, 1384–1389.
- Behjati, S., Huch, M., van Boxtel, R., Karthaus, W., Wedge, D.C., Tamuri, A.U., Martincorena, I., Petljak, M., Alexandrov, L.B., Gudem, G., et al. (2014). Genome sequencing of normal cells reveals developmental lineages and mutational processes. *Nature* 513, 422–425.
- Buganim, Y., Faddah, D.A., Cheng, A.W., Itskovich, E., Markoulaki, S., Ganz, K., Klemm, S.L., van Oudenaarden, A., and Jaenisch, R. (2012). Single-cell expression analyses during cellular reprogramming reveal an early stochastic and a late hierarchic phase. *Cell* 150, 1209–1222.
- Canham, M.A., Sharov, A.A., Ko, M.S.H., and Brickman, J.M. (2010). Functional heterogeneity of embryonic stem cells revealed through translational amplification of an early endodermal transcript. *PLoS Biol.* 8, e1000379.
- Chambers, I., Silva, J., Colby, D., Nichols, J., Nijmeijer, B., Robertson, M., Vrana, J., Jones, K., Grotewold, L., and Smith, A. (2007). Nanog safeguards pluripotency and mediates germline development. *Nature* 450, 1230–1234.
- Chen, K.H., Boettiger, A.N., Moffitt, J.R., Wang, S., and Zhuang, X. (2015). RNA imaging. Spatially resolved, highly multiplexed RNA profiling in single cells. *Science* 348, aaa6090.
- Clayton, E., Doupé, D.P., Klein, A.M., Winton, D.J., Simons, B.D., and Jones, P.H. (2007). A single type of progenitor cell maintains normal epidermis. *Nature* 446, 185–189.
- Crosetto, N., Bienko, M., and van Oudenaarden, A. (2015). Spatially resolved transcriptomics and beyond. *Nat. Rev. Genet.* 16, 57–66.
- Dan, J., Li, M., Yang, J., Li, J., Okuka, M., Ye, X., and Liu, L. (2013). Roles for *Tbx3* in regulation of two-cell state and telomere elongation in mouse ES cells. *Sci. Rep.* 3, 3492.
- Dietrich, J.-E., and Hiiragi, T. (2007). Stochastic patterning in the mouse preimplantation embryo. *Development* 134, 4219–4231.
- Duffy, K.R., Wellard, C.J., Markham, J.F., Zhou, J.H.S., Holmberg, R., Hawkins, E.D., Hasbold, J., Dowling, M.R., and Hodgkin, P.D. (2012). Activation-induced B cell fates are selected by intracellular stochastic competition. *Science* 335, 338–341.
- Elowitz, M.B., Levine, A.J., Siggia, E.D., and Swain, P.S. (2002). Stochastic gene expression in a single cell. *Science* 297, 1183–1186.
- Evrony, G.D., Lee, E., Mehta, B.K., Benjamini, Y., Johnson, R.M., Cai, X., Yang, L., Haseley, P., Lehmann, H.S., Park, P.J., and Walsh, C.A. (2015). Cell lineage analysis in human brain using endogenous retroelements. *Neuron* 85, 49–59.
- Falco, G., Lee, S.-L., Stanghellini, I., Bassey, U.C., Hamatani, T., and Ko, M.S.H. (2007). *Zscan4*: a novel gene expressed exclusively in late 2-cell embryos and embryonic stem cells. *Dev. Biol.* 307, 539–550.
- Femino, A.M., Fay, F.S., Fogarty, K., and Singer, R.H. (1998). Visualization of single RNA transcripts in situ. *Science* 280, 585–590.
- Feng, B., Jiang, J., Kraus, P., Ng, J.H., Heng, J.-C.D., Chan, Y.-S., Yaw, L.-P., Zhang, W., Loh, Y.-H., Han, J., et al. (2009). Reprogramming of fibroblasts into induced pluripotent stem cells with orphan nuclear receptor *Esrrb*. *Nat. Cell Biol.* 11, 197–203.
- Festuccia, N., Osorno, R., Halbritter, F., Karwacki-Neisius, V., Navarro, P., Colby, D., Wong, F., Yates, A., Tomlinson, S.R., and Chambers, I. (2012). *Esrrb* is a direct Nanog target gene that can substitute for Nanog function in pluripotent cells. *Cell Stem Cell* 11, 477–490.
- Filipczyk, A., Marr, C., Hastreiter, S., Feigelman, J., Schwarzfischer, M., Hoppe, P.S., Loeffler, D., Kokkalis, K.D., Ende, M., Schaubberger, B., et al. (2015). Network plasticity of pluripotency transcription factors in embryonic stem cells. *Nat. Cell Biol.* 17, 1235–1246.
- Friedman, N., Cai, L., and Xie, X.S. (2006). Linking stochastic dynamics to population distribution: an analytical framework of gene expression. *Phys. Rev. Lett.* 97, 168302.
- Furusawa, T., Ohkoshi, K., Honda, C., Takahashi, S., and Tokunaga, T. (2004). Embryonic stem cells expressing both platelet endothelial cell adhesion molecule-1 and stage-specific embryonic antigen-1 differentiate predominantly into epiblast cells in a chimeric embryo. *Biol. Reprod.* 70, 1452–1457.
- Gupta, P.B., Fillmore, C.M., Jiang, G., Shapira, S.D., Tao, K., Kuperwasser, C., and Lander, E.S. (2011). Stochastic state transitions give rise to phenotypic equilibrium in populations of cancer cells. *Cell* 146, 633–644.
- Hanna, J., Saha, K., Pando, B., van Zon, J., Lengner, C.J., Creighton, M.P., van Oudenaarden, A., and Jaenisch, R. (2009). Direct cell reprogramming is a stochastic process amenable to acceleration. *Nature* 462, 595–601.
- Hayashi, K., Lopes, S.M.C. de S., Tang, F., and Surani, M.A. (2008). Dynamic equilibrium and heterogeneity of mouse pluripotent stem cells with distinct functional and epigenetic states. *Cell Stem Cell* 3, 391–401.
- Hormoz, S., Desprat, N., and Shraiman, B.I. (2015). Inferring epigenetic dynamics from kin correlations. *Proc. Natl. Acad. Sci. USA* 112, E2281–E2289.
- Ieda, M., Fu, J.-D., Delgado-Olguin, P., Vedantham, V., Hayashi, Y., Bruneau, B.G., and Srivastava, D. (2010). Direct reprogramming of fibroblasts into functional cardiomyocytes by defined factors. *Cell* 142, 375–386.
- Ivanova, N., Dobrin, R., Lu, R., Kotenko, I., Levorse, J., DeCoste, C., Schafer, X., Lun, Y., and Lemischka, I.R. (2006). Dissecting self-renewal in stem cells with RNA interference. *Nature* 442, 533–538.
- Jiang, N., He, J., Weinstein, J.A., Penland, L., Sasaki, S., He, X.S., Dekker, C.L., Zheng, N.Y., Huang, M., Sullivan, M., et al. (2013). Lineage structure of the human antibody repertoire in response to influenza vaccination. *Sci. Transl. Med.* 5, 171ra19.
- Kagey, M.H., Newman, J.J., Bilodeau, S., Zhan, Y., Orlando, D.A., van Berkum, N.L., Ebmeier, C.C., Goossens, J., Rahl, P.B., Levine, S.S., et al. (2010). Mediator and cohesin connect gene expression and chromatin architecture. *Nature* 467, 430–435.
- Kalmar, T., Lim, C., Hayward, P., Muñoz-Descalzo, S., Nichols, J., Garcia-Ojalvo, J., and Martinez Arias, A. (2009). Regulated fluctuations in nanog expression mediate cell fate decisions in embryonic stem cells. *PLoS Biol.* 7, e1000149.
- Klein, A.M., and Simons, B.D. (2011). Universal patterns of stem cell fate in cycling adult tissues. *Development* 138, 3103–3111.
- Klein, A.M., Mazutis, L., Akartuna, I., Tallapragada, N., Veres, A., Li, V., Peshkin, L., Weitz, D.A., and Kirschner, M.W. (2015). Droplet barcoding for single-cell transcriptomics applied to embryonic stem cells. *Cell* 161, 1187–1201.
- Kumar, R.M., Cahan, P., Shalek, A.K., Satija, R., DaleyKeyser, A.J., Li, H., Zhang, J., Pardee, K., Gennert, D., Trombetta, J.J., et al. (2014). Deconstructing transcriptional heterogeneity in pluripotent stem cells. *Nature* 516, 56–61.
- Leder, K., Pitter, K., Laplant, Q., Hambardzumyan, D., Ross, B.D., Chan, T.A., Holland, E.C., and Michor, F. (2014). Mathematical modeling of PDGF-driven glioblastoma reveals optimized radiation dosing schedules. *Cell* 156, 603–616.
- Lee, R.E.C., Walker, S.R., Savery, K., Frank, D.A., and Gaudet, S. (2014). Fold change of nuclear NF- $\kappa$ B determines TNF-induced transcription in single cells. *Mol. Cell* 53, 867–879.
- Lopez-Garcia, C., Klein, A.M., Simons, B.D., and Winton, D.J. (2010). Intestinal stem cell replacement follows a pattern of neutral drift. *Science* 330, 822–825.
- Lu, R., Yang, A., and Jin, Y. (2011). Dual functions of T-box 3 (*Tbx3*) in the control of self-renewal and extraembryonic endoderm differentiation in mouse embryonic stem cells. *J. Biol. Chem.* 286, 8425–8436.

- Lu, Y., Xue, Q., Eisele, M.R., Sulistijo, E.S., Brower, K., Han, L., Amir, A.D., Pe'er, D., Miller-Jensen, K., and Fan, R. (2015). Highly multiplexed profiling of single-cell effector functions reveals deep functional heterogeneity in response to pathogenic ligands. *Proc. Natl. Acad. Sci. USA* *112*, E607–E615.
- Lubeck, E., and Cai, L. (2012). Single-cell systems biology by super-resolution imaging and combinatorial labeling. *Nat. Methods* *9*, 743–748.
- Lubeck, E., Coskun, A.F., Zhiyentayev, T., Ahmad, M., and Cai, L. (2014). Single-cell in situ RNA profiling by sequential hybridization. *Nat. Methods* *11*, 360–361.
- Macfarlan, T.S., Gifford, W.D., Driscoll, S., Lettieri, K., Rowe, H.M., Bonanomi, D., Firth, A., Singer, O., Trono, D., and Pfaff, S.L. (2012). Embryonic stem cell potency fluctuates with endogenous retrovirus activity. *Nature* *487*, 57–63.
- Martello, G., Sugimoto, T., Diamanti, E., Joshi, A., Hannah, R., Ohtsuka, S., Göttgens, B., Niwa, H., and Smith, A. (2012). Esrrb is a pivotal target of the Gsk3/Tcf3 axis regulating embryonic stem cell self-renewal. *Cell Stem Cell* *11*, 491–504.
- Miyazari, Y., and Torres-Padilla, M.-E. (2012). Control of ground-state pluripotency by allelic regulation of Nanog. *Nature* *483*, 470–473.
- Navin, N., Kendall, J., Troge, J., Andrews, P., Rodgers, L., McIndoo, J., Cook, K., Stepansky, A., Levy, D., Esposito, D., et al. (2011). Tumour evolution inferred by single-cell sequencing. *Nature* *472*, 90–94.
- Niwa, H., Ogawa, K., Shimosato, D., and Adachi, K. (2009). A parallel circuit of LIF signalling pathways maintains pluripotency of mouse ES cells. *Nature* *460*, 118–122.
- Norman, T.M., Lord, N.D., Paulsson, J., and Losick, R. (2013). Memory and modularity in cell-fate decision making. *Nature* *503*, 481–486.
- Ohnishi, Y., Huber, W., Tsumura, A., Kang, M., Xenopoulos, P., Kurimoto, K., Oles, A.K., Araúzo-Bravo, M.J., Saitou, M., Hadjantonakis, A.-K., and Hiiragi, T. (2014). Cell-to-cell expression variability followed by signal reinforcement progressively segregates early mouse lineages. *Nat. Cell Biol.* *16*, 27–37.
- Ozbudak, E.M., Thattai, M., Kurtser, I., Grossman, A.D., and van Oudenaarden, A. (2002). Regulation of noise in the expression of a single gene. *Nat. Genet.* *31*, 69–73.
- Peccoud, J., and Ycart, B. (1995). Markovian modeling of gene-product synthesis. *Theor. Popul. Biol.* *48*, 222–234.
- Poloni, A., Maurizi, G., Leoni, P., Serrani, F., Mancini, S., Frontini, A., Zingaretti, M.C., Siquini, W., Sarzani, R., and Cinti, S. (2012). Human dedifferentiated adipocytes show similar properties to bone marrow-derived mesenchymal stem cells. *Stem Cells* *30*, 965–974.
- Purvis, J.E., Karhohs, K.W., Mock, C., Batchelor, E., Loewer, A., and Lahav, G. (2012). p53 dynamics control cell fate. *Science* *336*, 1440–1444.
- Raj, A., Peskin, C.S., Tranchina, D., Vargas, D.Y., and Tyagi, S. (2006). Stochastic mRNA synthesis in mammalian cells. *PLoS Biol.* *4*, e309.
- Raj, A., van den Bogaard, P., Rifkin, S.A., van Oudenaarden, A., and Tyagi, S. (2008). Imaging individual mRNA molecules using multiple singly labeled probes. *Nat. Methods* *5*, 877–879.
- Ristow, M., Müller-Wieland, D., Pfeiffer, A., Krone, W., and Kahn, C.R. (1998). Obesity associated with a mutation in a genetic regulator of adipocyte differentiation. *N. Engl. J. Med.* *339*, 953–959.
- Rugg-Gunn, P.J., Cox, B.J., Lanner, F., Sharma, P., Ignatchenko, V., McDonald, A.C.H., Garner, J., Gramolini, A.O., Rossant, J., and Kislinger, T. (2012). Cell-surface proteomics identifies lineage-specific markers of embryo-derived stem cells. *Dev. Cell* *22*, 887–901.
- Sasagawa, Y., Nikaido, I., Hayashi, T., Danno, H., Uno, K.D., Imai, T., and Ueda, H.R. (2013). Quartz-Seq: a highly reproducible and sensitive single-cell RNA sequencing method, reveals non-genetic gene-expression heterogeneity. *Genome Biol.* *14*, R31.
- Simons, B.D., and Clevers, H. (2011). Strategies for homeostatic stem cell self-renewal in adult tissues. *Cell* *145*, 851–862.
- Singer, Z.S., Yong, J., Tischler, J., Hackett, J.A., Altinok, A., Surani, M.A., Cai, L., and Elowitz, M.B. (2014). Dynamic heterogeneity and DNA methylation in embryonic stem cells. *Mol. Cell* *55*, 319–331.
- Singh, A.M., Hamazaki, T., Hankowski, K.E., and Terada, N. (2007). A heterogeneous expression pattern for Nanog in embryonic stem cells. *Stem Cells* *25*, 2534–2542.
- Slack, J.M., and Tosh, D. (2001). Transdifferentiation and metaplasia—switching cell types. *Curr. Opin. Genet. Dev.* *11*, 581–586.
- Smith, Z.D., Nachman, I., Regev, A., and Meissner, A. (2010). Dynamic single-cell imaging of direct reprogramming reveals an early specifying event. *Nat. Biotechnol.* *28*, 521–526.
- Snippert, H.J., van der Flier, L.G., Sato, T., van Es, J.H., van den Born, M., Kroon-Veenboer, C., Barker, N., Klein, A.M., van Rheenen, J., Simons, B.D., and Clevers, H. (2010). Intestinal crypt homeostasis results from neutral competition between symmetrically dividing Lgr5 stem cells. *Cell* *143*, 134–144.
- Sokolik, C., Liu, Y., Bauer, D., McPherson, J., Broeker, M., Heimberg, G., Qi, L.S., Sivak, D.A., and Thomson, M. (2015). Transcription factor competition allows embryonic stem cells to distinguish authentic signals from noise. *Cell Syst.* *1*, 117–129.
- Storm, M.P., Kumpfmüller, B., Bone, H.K., Buchholz, M., Sanchez Ripoll, Y., Chaudhuri, J.B., Niwa, H., Tosh, D., and Welham, M.J. (2014). Zscan4 is regulated by PI3-kinase and DNA-damaging agents and directly interacts with the transcriptional repressors LSD1 and CtBP2 in mouse embryonic stem cells. *PLoS ONE* *9*, e89821.
- Suda, T., Suda, J., and Ogawa, M. (1983). Single-cell origin of mouse hemopoietic colonies expressing multiple lineages in variable combinations. *Proc. Natl. Acad. Sci. USA* *80*, 6689–6693.
- Suda, J., Suda, T., and Ogawa, M. (1984a). Analysis of differentiation of mouse hemopoietic stem cells in culture by sequential replating of paired progenitors. *Blood* *64*, 393–399.
- Suda, T., Suda, J., and Ogawa, M. (1984b). Disparate differentiation in mouse hemopoietic colonies derived from paired progenitors. *Proc. Natl. Acad. Sci. USA* *81*, 2520–2524.
- Suter, D.M., Molina, N., Gatfield, D., Schneider, K., Schibler, U., and Naef, F. (2011). Mammalian genes are transcribed with widely different bursting kinetics. *Science* *332*, 472–474.
- Suzuki, N., Yamazaki, S., Yamaguchi, T., Okabe, M., Masaki, H., Takaki, S., Otsu, M., and Nakauchi, H. (2013). Generation of engraftable hematopoietic stem cells from induced pluripotent stem cells by way of teratoma formation. *Mol. Ther.* *21*, 1424–1431.
- Talchai, C., Xuan, S., Lin, H.V., Sussel, L., and Accili, D. (2012). Pancreatic  $\beta$  cell dedifferentiation as a mechanism of diabetic  $\beta$  cell failure. *Cell* *150*, 1223–1234.
- Tata, P.R., Mou, H., Pardo-Saganta, A., Zhao, R., Prabhu, M., Law, B.M., Vinarsky, V., Cho, J.L., Breton, S., Sahay, A., et al. (2013). Dedifferentiation of committed epithelial cells into stem cells in vivo. *Nature* *503*, 218–223.
- Thiery, J.P., Acloque, H., Huang, R.Y.J., and Nieto, M.A. (2009). Epithelial-mesenchymal transitions in development and disease. *Cell* *139*, 871–890.
- Toyooka, Y., Shimosato, D., Murakami, K., Takahashi, K., and Niwa, H. (2008). Identification and characterization of subpopulations in undifferentiated ES cell culture. *Development* *135*, 909–918.
- van den Berg, D.L.C., Zhang, W., Yates, A., Engelen, E., Takacs, K., Bezstarosti, K., Demmers, J., Chambers, I., and Poot, R.A. (2008). Estrogen-related receptor beta interacts with Oct4 to positively regulate Nanog gene expression. *Mol. Cell. Biol.* *28*, 5986–5995.
- Vo, L.T., and Daley, G.Q. (2015). De novo generation of HSCs from somatic and pluripotent stem cell sources. *Blood* *125*, 2641–2648.
- Waddington, C.H. (1940). *Organisers and Genes* (The University Press).
- Wagenblast, E., Soto, M., Gutiérrez-Ángel, S., Hartl, C.A., Gable, A.L., Maceli, A.R., Erard, N., Williams, A.M., Kim, S.Y., Dickkopf, S., et al. (2015). A model of breast cancer heterogeneity reveals vascular mimicry as a driver of metastasis. *Nature* *520*, 358–362.

Weidgang, C.E., Russell, R., Tata, P.R., Kühl, S.J., Illing, A., Müller, M., Lin, Q., Brunner, C., Boeckers, T.M., Bauer, K., et al. (2013). TBX3 directs cell-fate decision toward mesendoderm. *Stem Cell Reports* 1, 248–265.

Wu, J., and Izpisua Belmonte, J.C. (2015). Dynamic pluripotent stem cell states and their applications. *Cell Stem Cell* 17, 509–525.

Yamaji, M., Ueda, J., Hayashi, K., Ohta, H., Yabuta, Y., Kurimoto, K., Nakato, R., Yamada, Y., Shirahige, K., and Saitou, M. (2013). PRDM14 ensures naive pluripotency through dual regulation of signaling and epigenetic pathways in mouse embryonic stem cells. *Cell Stem Cell* 12, 368–382.

Yamanaka, Y., Lanner, F., and Rossant, J. (2010). FGF signal-dependent segregation of primitive endoderm and epiblast in the mouse blastocyst. *Development* 137, 715–724.

Zalzman, M., Falco, G., Sharova, L.V., Nishiyama, A., Thomas, M., Lee, S.-L., Stagg, C.A., Hoang, H.G., Yang, H.-T., Indig, F.E., et al. (2010). Zscan4 regulates telomere elongation and genomic stability in ES cells. *Nature* 464, 858–863.

Zong, C., Lu, S., Chapman, A.R., and Xie, X.S. (2012). Genome-wide detection of single-nucleotide and copy-number variations of a single human cell. *Science* 338, 1622–1626.



## STAR★METHODS

## KEY RESOURCES TABLE

| REAGENT or RESOURCE                                                   | SOURCE                                 | IDENTIFIER                     |
|-----------------------------------------------------------------------|----------------------------------------|--------------------------------|
| Chemicals, Peptides, and Recombinant Proteins                         |                                        |                                |
| Accutase                                                              | ThermoFisher                           | CAT# A1110501                  |
| Cell Media: 1. GMEM                                                   | Sigma                                  | CAT# G5154                     |
| Cell Media: 2. Fetal Bovine Serum                                     | Hyclone                                | CAT# SH30070.02 Lot# AYE161472 |
| Cell Media: 3. 1X Minimum Essential Medium Non- Essential Amino Acids | ThermoFisher                           | REF# 11140-050                 |
| Cell Media: 4. 1 mM sodium pyruvate                                   | ThermoFisher                           | REF# 11360-070                 |
| Cell Media: 5. 50 $\mu$ M $\beta$ -Mercaptoethanol                    | ThermoFisher                           | REF# 21985-023                 |
| Cell Media: 6. 1000 units/mL Leukemia inhibiting factor               | ESGRO, Millipore                       | CAT#ESG1107                    |
| Cell Media: 7. 2 mM L-glutamine                                       | ThermoFisher                           | REF# 25030-81                  |
| Cell Media: 8. 100 units/mL penicillin/streptomycin                   | ThermoFisher                           | REF# 15070-063                 |
| Human Laminin-511                                                     | BioLamina                              | CAT# LN511-03                  |
| 24-well glass bottom plates                                           | MatTek                                 | CAT# NC9988706                 |
| FISH dyes Alexa 555, 594, 647                                         | ThermoFisher                           | REF# A20009, 4, 6              |
| Formamide                                                             | ThermoFisher                           | AM9342                         |
| 20x SSC                                                               | ThermoFisher                           |                                |
| Dextran Sulfate                                                       | Fisher                                 | CAS 9011-18-1                  |
| E.coli tRNA                                                           | Roche                                  | CAT# 10109541001               |
| Ribonucleoside Vanadyl complex                                        | NEB                                    | S1402S                         |
| FISH Hybridization Buffer: nuclease free water                        | ThermoFisher                           | REF# 10977-015                 |
| DAPI                                                                  | ThermoFisher                           | D1306                          |
| Critical Commercial Assays                                            |                                        |                                |
| RNA extraction kit                                                    | QIAGEN                                 | 74104                          |
| NEBNext Ultra RNA Library Prep Kit for Illumina                       | NEB                                    | NEB #E7530                     |
| NEBNext hairpin adaptors                                              | NEB                                    | NEB #E7335                     |
| Deposited Data                                                        |                                        |                                |
| RNA-seq data                                                          | This paper                             | GEO: GSE86417                  |
| Experimental Models: Cell Lines                                       |                                        |                                |
| Esrrb Reporter Line                                                   | This paper                             | N/A                            |
| Tbx3-Esrrb Reporter Line                                              | This paper                             | N/A                            |
| Zscan4c Reporter Line                                                 | This paper                             | N/A                            |
| Experimental Models: Organisms/Strains                                |                                        |                                |
| E14 cells (E14Tg2a.4)                                                 | Mutant Mouse Regional Resource Centers | 015890-UCD                     |
| Recombinant DNA                                                       |                                        |                                |
| Donor construct Esrrb T2A-H2B-XFP-P2A-PuroR                           | This paper                             | N/A                            |
| Donor construct Esrrb T2A-H2B-XFP-P2A-BlastR                          | This paper                             | N/A                            |
| Donor construct Tbx3 T2A-H2B-XFP-P2A-PuroR                            | This paper                             | N/A                            |
| Sequence-Based Reagents                                               |                                        |                                |
| CRISPR primers for making the reporter cell lines                     | This paper                             | <a href="#">Table S2</a>       |
| Esrrb smFISH probes                                                   | This paper                             | <a href="#">Table S1</a>       |
| Tbx3 smFISH probes                                                    | This paper                             | <a href="#">Table S1</a>       |
| Zscan4c smFISH probes                                                 | This paper                             | <a href="#">Table S1</a>       |

(Continued on next page)

**Continued**

| REAGENT or RESOURCE                           | SOURCE         | IDENTIFIER |
|-----------------------------------------------|----------------|------------|
| Software and Algorithms                       |                |            |
| Movie tracking code (MATLAB)                  | This paper     | N/A        |
| FISH dot detection and counting code (MATLAB) | This paper     | N/A        |
| CellLines Data Visualization Tool             | This paper     | N/A        |
| Galaxy Web Server for Tophat and Cufflinks    | Open web-based | N/A        |
| KCA Analysis Code (MATLAB)                    | This paper     | N/A        |

**CONTACT FOR REAGENT AND RESOURCE SHARING**

The Lead Contact M.B.E. is willing to distribute all materials (including constructs and engineered cell lines), datasets, software and analysis tools, and protocols used in the manuscript. Requests should be made directly to Michael B. Elowitz at [melowitz@caltech.edu](mailto:melowitz@caltech.edu) or by mail at California Institute of Technology, 1200 E. California Blvd., MC 114-96, Pasadena, CA 91125.

**EXPERIMENTAL MODEL AND SUBJECT DETAILS****Cell Line Construction and Tissue Culture**

E14 cells (E14Tg2a.4) obtained from Mutant Mouse Regional Resource Centers were used as the base line for all cell line construction. Knock-In reporters were generated using CRISPR/Cas9 with guides targeting the C terminus of the genes of interest (Table S2), using donor vectors harboring  $\pm$  300bp homology to the target locus flanking a T2A-H2B-XFP-P2A-PuroR/BlastR (see Figure S2C). Single clones were first grown in 2i and isolated based on puromycin resistance and characterized for correct targeting using qPCR for genomic copy number, and then by a co-localization test of the endogenous targeted gene and XFP by smFISH (Figures S2A and S2C). For the *Zscan4* reporter, the 2570 base pairs upstream of the *Zscan4c* start codon were used as a promoter fragment reporter (as described in Zalzman et al., 2010), to drive expression of H2B-mTurquoise2 on a PiggyBac integrated vector, which also contained a separate Blasticidin resistance cassette under an SV40 promoter. Cells were maintained at 37°C and 5% CO<sub>2</sub> in GMEM, 10% FBS, 2 mM L-glutamine, 100 units/ml penicillin, 100 ug/ml streptomycin, 1 mM sodium pyruvate, 1000 units/ml Leukemia Inhibitory Factor (LIF, Millipore), 1X Minimum Essential Medium Non-Essential Amino Acids (MEM NEAA, ThermoFisher) and 50 uM  $\beta$ -Mercaptoethanol. Cell lines were also stably integrated with a PiggyBac-pGK-palmitoylated-mTurquoise2/HygroR to enable 3D segmentation of cell membranes.

**METHOD DETAILS****Time Lapse Microscopy and Single-Molecule Fluorescence In Situ Hybridization Imaging**

For movies, cells were plated on Laminin-511 (BioLamina) in 24-well glass bottom plates (MatTek) six hours prior to the start of the movie at a density of 2000/well. Snapshots were taken at 12 min intervals for  $\sim$ 48 hr, and tracked and segmented using home-grown MATLAB scripts. Immediately following the end of the movie, cells were fixed in 4% formaldehyde for five minutes at room temperature, and permeabilized in RNase-free 70% ethanol and stored at  $-20^{\circ}\text{C}$  overnight. The following day, cells were hybridized for smFISH overnight at 30°C, where genes of interest were simultaneously targeted with up to 48 20-mer DNA oligos, with each gene's probeset coupled to Alexa 555, 594, or 647 (ThermoFisher). Each 20-mer oligo was used at  $\sim$ 3nM final concentration. The hybridization buffer was composed of 20% formamide, 2X SSC, 0.1g/ml dextran sulfate, 1mg/ml E.coli tRNA, and 2mM vanadyl ribonucleoside complex, in nuclease free water. After overnight incubation in hybridization buffer and probes, cells were washed once in 20% Formamide and 2X SSC at 30°C for 30min, twice in 2X SSC at room temperature, stained with DAPI, and finally imaged in 2X SSC.

smFISH imaging was performed on a Nikon Ti-E with Perfect Focus, Semrock FISH filtersets, Lumencor Sola illumination, 60x 1.4NA oil objective, and an Andor Zyla 4.2 sCMOS camera. Z-slices of DAPI, membrane-mTurquoise2 and smFISH were taken every 400nm through the sample. Segmentation of cellular boundaries was performed using the membrane targeted palmitoylated-mTurquoise2 with a 3D watershed algorithm. Dots were detected by thresholding on the distribution of local maxima of Laplacian-of-Gaussian kernel responses performed on each z-slice, with local-maxima defined around a 26-connected-pixel 3D region. Automatic image registration was performed in MATLAB between the fluorescent protein in the final frame of the movie and DAPI stained image collected during smFISH imaging.

**RNA-Seq**

On two separate days for biological replicates,  $\sim$ 500,000 were sorted of each subpopulation. Only the top 2% of reporter cells were collected in the positive gate for *Zscan4c*, while the lowest 50% were collected for the negative gate. For the *Esrrb/Tbx3* double reporter (described above), 4% of the population made up the sorted double-negative population, 14% made up the sorted double positive population, and 63% made up the sorted *Esrrb* only population. The remaining unsorted cells made up buffer regions

between subpopulations. Consistent with smFISH results, no *Esrrb*-/*Tbx3*+ population was observed. Differences in population fractions from smFISH-estimated population fractions is due to the half-life of the long-lived H2B-fused fluorescent proteins which only dilute by cellular division. Immediately following the sort, RNA was extracted using the QIAGEN RNEasy Mini kit. 100 base single-end reads were generated on a HiSeq 2500. Galaxy was used to process RNaseq reads, using the Cufflinks package with default options. Briefly, reads were mapped using default Tophat parameters against the mouse mm10 genome. Cufflinks was used to estimate transcript abundance, and Cuffdiff was used to identify differentially expressed genes within E-T-, E+T-, and E+T+ sets, and then separately between Z+ and Z- sets.

## QUANTIFICATION AND STATISTICAL ANALYSIS

### Kin Correlation Analysis Applied to Non-uniform Cell State Distributions

In [Box 1](#) of the main text, we derived a formula that related the two-cell correlation matrices to the transition matrix, under the assumption that the dynamics was reversible (or equivalently that it satisfied the condition of detailed balance) and briefly generalized the result to the case where all the states are not equally likely. Here, we will derive in full detail a formula for inferring the transition matrix from the observed two-cell correlation matrices assuming only that the dynamics is reversible. Then, in section 3 below, we will further relax the assumption of reversibility, and derive a more general expression using three-cell correlation functions to infer transition dynamics.

As in [Box 1](#) of the main text, consider a transition matrix  $T(I|M)$  that represents the probability of observing a daughter cell in state  $I$  given that the parent cell was in state  $M$ . We assume that a given state  $I$  is observed in the population with frequency  $p_I$ .

With detailed-balance, for any given pair of states, the forward and reverse fluxes must be equal:

$$T(I|M)p_M = T(M|I)p_I.$$

The simpler condition used in [Box 1](#) that  $T$  is a symmetric matrix,  $T(I|J) = T(J|I)$  is a special case of this expression, valid when  $p_I = p_J$ . A similar condition must hold going from a parent cell in state  $M$  to a descendent in state  $I$  after two generations:

$$\sum_s T(I|S)T(S|M)p_M = \sum_s T(M|S)T(S|I)p_I,$$

where  $s$  is summed over all possible state of the intermediate cell between the parent cell and its grand-daughter. The summation is equivalent to matrix multiplication and can be rewritten as,

$$\sum_s T(I|S)T(S|M) = T^2(I|M).$$

More generally, for a cell in state  $M$  and its descendent  $u$  generations later in state  $I$ , the following condition must be satisfied:

$$T^u(I|M)p_M = T^u(M|I)p_I.$$

The joint probability of observing two cells at lineage distance  $u$  in states  $I$  and  $J$  is given by,

$$C_{IJ}(u) = \sum_M T^u(I|M)T^u(J|M)p_M.$$

Reversibility of the dynamics implies that  $T^u(J|M)p_M = T^u(M|J)p_J$ . Making this substitution, we have,

$$C_{IJ}(u) = p_J \sum_M T^u(I|M)T^u(M|J) = p_J T^{2u}(I|J) \quad (1)$$

To infer, we observe the correlation matrix  $\mathbf{C}(u)$ , and solve for the transition matrix  $\mathbf{T}$ . Equation (1) can be rearranged to express the transition matrix in term of the correlation matrix, by first defining a rescaled correlation matrix,

$$\tilde{\mathbf{C}}_{IJ}(u) = p_J^{-1} C_{IJ}(u). \quad (2)$$

It then follows that the transition matrix can be recovered by taking the appropriate root of the matrix  $\tilde{\mathbf{C}}$ ,

$$\mathbf{T} = \tilde{\mathbf{C}}^{1/(2u)}. \quad (3)$$

### Kin Correlation Analysis Applied to Time-Varying Transition Rates

Previously, we assumed that transition rates remain constant over time. However, in a developmental context they could change systematically with time or generation number. In this subsection, we extend the above results to such cases. We still assume that the dynamics are stationary and reversible. As shown below, it is possible to fully recover time-varying dynamics by using the two-cell correlation functions at all lineage distances.

Consider a time-varying transition matrix,  $\mathbf{T}(u)$ , where  $u$  denotes the number of generations back from the final time-point.  $u$  generations back, the probability of observing a daughter cell in state  $I$  conditional on the state  $M$  of its parent is given by the  $I, M$  th element of  $\mathbf{T}(u)$ . For an example of such dynamics, see [Figure 5C](#) in the main text.

The two-cell correlation matrix for a pair of cells at lineage distance  $u$  takes the form,

$$C_{IJ}(u) = \rho_J \sum_M S_u(I|M) S_u(M|J) = \rho_J S_u^2(I|J),$$

where  $\mathbf{S}$  is an effective transition matrix given by  $\mathbf{S}_u = \mathbf{T}(1)\mathbf{T}(2)\cdots\mathbf{T}(u)$ , and  $\rho_J$  denotes the endpoint frequency of cells in state  $J$ . From a measurement of the two-cell correlation matrix  $\mathbf{C}(u)$ ,  $\mathbf{S}_u$  can be inferred using Equations 2 and 3, namely, define  $\tilde{\mathbf{C}}_{IJ}(u) = \sqrt{\rho_J^{-1}} C_{IJ}(u)$ . It follows,

$$\mathbf{S}_u = \sqrt{\tilde{\mathbf{C}}(u)}$$

To recover the time-varying transition rates  $\mathbf{T}(u)$ , we start at  $u = 1$  and work our way backward to larger values of  $u$ . The transition rates are given by,

$$\mathbf{T}(1) = \mathbf{S}_1,$$

$$\mathbf{T}(2) = \mathbf{T}^{-1}(1)\mathbf{S}_2,$$

$$\mathbf{T}(3) = \mathbf{T}^{-1}(2)\mathbf{T}^{-1}(1)\mathbf{S}_3,$$

⋮

$$\mathbf{T}(u) = \mathbf{T}^{-1}(u-1)\cdots\mathbf{T}^{-1}(2)\mathbf{T}^{-1}(1)\mathbf{S}_u.$$

Lastly, we note that the above framework can be in principle extended to the case of continuous dynamics where the transition matrix is a continuous function of absolute time back to the common ancestor, i.e., where transitions have an occurrence probability per unit time (rather than per generation), and where this probability itself changes with absolute time. To do so, the effective transition matrix,  $\mathbf{S}_u$ , is computed by taking the product integral of the continuous transition rate matrix,  $\mathbf{T}'$ , from the current time,  $t = 0$ , back to the time of the common ancestor,  $t = t_c$ , namely,  $\mathbf{S}'_u = \exp(\int_{t=0}^{t=t_c} \ln \mathbf{T}'(t) dt)$ . This formulation accounts for biologically relevant cases in which the durations of cell cycles vary from cell to cell and/or over time.

### Kin Correlation Analysis with Probabilistic State Assignment

We show that the distribution of the *Esrrb* transcript counts in the low (E-) and high (E+) states overlapped significantly (Figure 2C), such that it was not possible to assign a definite *Esrrb* state (either E- or E+) to a cell given a readout of its *Esrrb* transcript count. Here, we explain how we assigned probabilistic *Esrrb* states to each cell, and how the KCA framework is applied to probabilistic states.

First, we fit a sum of two negative binomial distributions to the distribution of *Esrrb* transcript counts in single cells (black lines in Figure 2C). Let's denote the distribution of transcript counts of the E- state as  $D_-(x)$  and that of the E+ state as  $D_+(x)$ , where  $x$  is an integer denoting the transcript count in a given cell. More specifically,  $D_-(x)$  is the probability that a cell in the E- state will have  $x$  *Esrrb* transcripts. The fit also has a free parameter that reflects the population fraction of each state. We will denote the population fraction of the E- state as  $f_-$  and the population fraction of the E+ state as  $f_+$ . It follows that  $f_- + f_+ = 1$ .

The probability that a cell with  $x$  *Esrrb* transcripts is in the E+ state is given by,

$$p_+ = \frac{f_+ D_+(x)}{f_- D_-(x) + f_+ D_+(x)}$$

The probability that the cell is in the E- state is simply  $p_- = 1 - p_+$ . For large transcript counts, e.g.,  $x = 200$ ,  $f_- D_-(x) \approx 0$ , which implies,  $p_+ \approx 1$ . Alternatively, for some intermediate values of transcript counts, e.g.,  $x = 75$ ,  $f_- D_-(x) = f_+ D_+(x)$ , which implies  $p_+ \approx 0.5$ , or that the cell is equally likely to be in the E- or the E+ state.

Correlation matrices can be computed using probabilistic states in a similar manner as with definite states. However, whereas with definite state assignments, each pair of cells in states  $I$  and  $J$  contributes 1 to the  $I, J$  th element of the correlation matrix and 0 to all the other elements, with probabilistic state assignments, each pair of cells contributes  $P_I P_J$  to element  $C_{IJ}$  of the correlation matrix.

Lastly, the switching rates can be inferred from the correlation matrices computed using probabilistic states in a similar way as outlined in the previous section. However, in cases where the overlap between the two distributions is not symmetric, i.e., when it is more likely to misclassify a cell in the E- state as E+ than vice-versa, we need to first adjust the correlation matrices for incorrect assignment of states.

On average, the probability that a cell in state  $J$  is assigned to state  $I$  is given by,

$$Q_{IJ} = \int_x \frac{f_I D_I(x)}{\sum_K f_K D_K(x)} D_J(x) dx$$

where the integration runs over all possible values of transcript counts,  $x$ , and the summation  $K$  is over all states.  $\mathbf{Q}$  is effectively a transition matrix satisfying the same properties as  $\mathbf{T}$ ; for example, columns of  $\mathbf{Q}$  sum to 1. However, unlike  $\mathbf{T}$ ,  $\mathbf{Q}$  does not capture actual cell state transitions, but rather effective state transitions caused by measurement errors (for example, ambiguous mapping from transcript counts to cell state). Thus, we can imagine the dynamics as follows: the state of a cell  $u$  generations after its ancestor is given by the appropriate power of the transition matrix, namely,  $\mathbf{T}^u$ . The measurement error, at the endpoint, results in one additional mixing of states as given by matrix  $\mathbf{Q}$ . Put together, the probability of observing a given state conditional on the state of the ancestor is given by the matrix  $\mathbf{Q}\mathbf{T}^u$ .

To infer the actual transition matrix  $\mathbf{T}$ , we must first remove the contribution of  $\mathbf{Q}$ . The actual population fraction of the states,  $\bar{p}$ , can be calculated from the measured population fractions,  $p$ , as follows,

$$\bar{p}_M = \hat{\mathbf{Q}}_{MN} p_N$$

where  $\hat{\mathbf{Q}}$  is the inverse of the matrix  $\mathbf{Q}$ . Similarly, the actual correlation matrix can be calculated from the measured correlation matrix as follows

$$\bar{\mathbf{C}} = \hat{\mathbf{Q}}\mathbf{C}\hat{\mathbf{Q}}^T,$$

where  $\hat{\mathbf{Q}}^T$  denotes the inverse of the transpose of matrix  $\mathbf{Q}$ . The corrected populations fractions,  $\bar{p}$ , and correlation matrix,  $\bar{\mathbf{C}}$ , can be used directly in Equations 2 and 3 above instead of  $p$  and  $\mathbf{C}$  to infer the actual transition matrix.

### Computing the Three-Cell Correlation Functions for a General Transition Matrix with Irreversible Dynamics

Here, we derive the general expression for the three-point correlation functions in terms of the transition matrix. As in the previous section, consider a transition matrix  $T(I|M)$  that represents the probability of observing a daughter cell in state  $I$  given that the parent cell was in state  $M$ . Unlike the previous section, we do not require that  $T(I|M)$  satisfies the condition of detailed balance, enabling analysis of cell state transition networks containing irreversible transitions.

We would like to calculate the joint probability of observing three cells in states  $I$ ,  $J$ , and  $K$ . The degree of relatedness of three cells is characterized by two lineage distance:  $u$ , the number of generations back to the common ancestor of the two more closely related pair of cells (observed to be in states  $J$  and  $K$ ), and  $v$ , the number of generations back to the common ancestor of all three cells (see Box 1 for a schematic).

The three-cell correlation function takes the form,

$$C_{IJK}(u, v) = \sum_M \left( \sum_S T^u(K|S) T^u(J|S) T^{v-u}(S|M) \right) T^v(I|M) p_M, \quad (4)$$

where the summation over  $S$  is over all possible states of the common ancestors of the two cells at lineage distance  $u$ . The summation over  $M$  is over all the possible states of the common ancestor of the three cells.  $p_M$  is the expected probability of observing the common ancestor of all three cells in state  $M$ .

For non-stationary dynamics, the probability of observing the common ancestor in a given state  $p_M$  changes from generation to generation. However,  $p_M$  is still related to the transition matrix in a self-consistent way. Namely, the probability that a cell  $u$  generations back will be in state  $M$  is given by

$$p_M(u) = T^{u_0-u}(M|N) p_N(u_0) \quad (5)$$

where  $T^{u_0-u}(M|N)$  denotes element  $M, N$  of the transition matrix taken to the power of  $u_0 - u$ .  $u_0$  is the number of generations back to the root of the tree, which is in state  $N$  with probability  $p_N(u_0)$ . Equation (5) captures how the population fraction of each state changes over time as a function of the initial distribution of the states and the transition matrix.

Equations (2) and (3) are general and do not require reversible (detailed balance) or stationary dynamics. Although an analytical solution for  $\mathbf{T}$  in terms of  $C_{IJK}(u, v)$  is not possible, we can solve the inference problem by considering the elements of the transition matrix as fitting parameters. We then calculate the expected three-cell correlation functions (Equation 4) and fit them to the observed three-cell correlation functions (see Methods in the main text for the numerical implementation).

### Simulating KCA for Various Types of Dynamics

Using KCA, we were able to accurately infer the underlying cell-state transition network and transition rates in simulations by observing 30 cell pedigrees of 5 generations (Figure S1). For reversible dynamics like those shown in Figures S1A and S1B, the transition network was inferred from the two-cell correlation functions. For networks with irreversible dynamics, like those shown in Figures S1C and S1D, we used the three-cell correlations for the inference. For example, in Figures S1B and S1C, which differ only in the reversibility of their transitions, the two-cell correlation functions are identical, but the three-cell correlation functions are different and can be used to infer the directionality of the transitions. Furthermore, we analyzed a previously published model of a 3-state system containing irreversible transitions among cancer cell states (Gupta et al., 2011), and verified that KCA with three-cell correlations could indeed infer the previously determined rates (Figure S1E). Finally, we asked whether the KCA framework could be applied to non-stationary, branching cell fate determination networks, similar to those frequently observed in development and immunology. We simulated a 3-level branched cell fate tree with specific transition rates, applied KCA, and recovered the correct rates within

statistical error (Figure S1D). This indicates that accurate inference is possible for branching fate trees with feasible amounts of experimental data.

Here, we describe the details of the simulations used to generate the results shown in Figure S1. Simulated pedigrees of 5 generations each were generated using MATLAB. For Figures S1A–S1C, the state of the root was selected randomly from the stationary distribution of cell states. In Figure S1D, the root was always set to the green state, resulting in a non-stationary distribution of cell states over the generations. At each generation, every node gave rise to two daughter nodes, whose states were selected randomly and independently from the probability distribution set by the state of the parent and the transition matrix. The two-cell and three-cell correlations were directly computed from the simulated pedigrees by measuring the frequency of occurrence of pairs and triplets of cell states at a given lineage distance over all pedigrees. We simulated 30 pedigrees for the plots in Figures S1A to S1C. For Figure S1D, we simulated 100 pedigrees. KCA using two-cell correlation functions was conducted on simulated data as outlined above using the framework in Box 1 and Supporting Information without any fitting. To infer the rates for irreversible dynamics, we used a set of fitting parameters, corresponding to the independent entries of a general asymmetric transition matrix. We then fit the three-cell correlation functions predicted from this transition matrix (see the STAR Methods) to the observed three-cell correlation functions. A non-linear least square fitting algorithm was used (implemented in MATLAB) to minimize the residual.

### Direct Measurement of *Esrrb* Switching Dynamics

We tracked and segmented each cell in time-lapse movies of colony growth using automated software and manual corrections, similar to previously described (Singer et al., 2014). By integrating the background corrected pixel intensity in the nucleus of each cell, we obtained the accumulated level of H2B-mCitrine fluorescence at every point along each cell cycle. The rate at which fluorescence accumulated was used to estimate the promoter activity of *Esrrb*. To identify changes in promoter activity that corresponded to state switching, we fit either a single line, or two piece-wise linear segments to the fluorescence readout of each cell using a least-squares method, implemented in MATLAB. The first and last hour of each cell cycle was discarded to ensure reliable fluorescence readout despite cell division. We used two criteria to identify state switching events: 1) the change in the slope across a division or between the segments of the two-line fit had to exceed a significance threshold. 2) A significant change in the slope (increase or decrease) had to persist into the subsequent cell cycle after division. The candidate switching events were identified automatically using a script implemented in MATLAB and then verified manually.

### Computing the Predicted Spatial Correlation Functions for *Esrrb*

We calculated the expected correlation of *Esrrb* state as a function of spatial separation distance from the inferred switching rates of *Esrrb* and the observed pedigrees as follows,

$$C_M(r) = \sum_u q(r|u)p(u) \sum_M T^u(I|M)T^u(J|M)p_M$$

where  $q(r|u)$  is the empirically determined probability of observing two cells at lineage distance  $u$  at spatial separation distance  $r$ ;  $q(r|u)$  is plotted in Figure 2Gii.  $p(u)$  is the probability that two randomly chosen cells will be at lineage distance  $u$ . This was empirically computed using the set of observed pedigrees. The expected and directly observed spatial correlation are plotted in Figure 2Gi.

### Selecting Marker Genes for the ES Pluripotency States

Previous studies have revealed that ES colonies exhibit a heterogeneous set of states potentially related to early embryonic cell types. For example, recent evidence identified a subpopulation of cells that express *Zscan4*, potentially corresponding to the totipotent 2 cell (2C)-state (Falco et al., 2007; Macfarlan et al., 2012). This state is also associated with telomere-elongation, essential for long-term culture in vitro (Zalzman et al., 2010) (although *Zscan4* has also been shown to be activated by DNA damage responses and PI3K signaling) (Storm et al., 2014). Furthermore, representing slightly later stages of development, both inner cell mass (ICM)-like and epiblast-like stages can be identified and distinguished in culture by the high or low expression, respectively, of a cluster of correlated genes that includes *Rex1*, *Nanog*, and *Esrrb*. The totipotent state, marked by *Zscan4* expression, shows low *Rex1/Nanog/Esrrb* expression (Singer et al., 2014), potentially defining a sub-population among *Rex1/Nanog/Esrrb*-low cells. Finally, we identified a complementary sub-population within the *Rex1/Nanog/Esrrb*-high population, marked by expression of *Tbx3*. *Tbx3* has been shown to destabilize pluripotency when lost or overexpressed. It also appears critical for mesendoderm specification, and its expression may change the global levels of DNA methylation in mouse ES cells (Dan et al., 2013; Ivanova et al., 2006; Lu et al., 2011; Niwa et al., 2009; Weidgang et al., 2013). However, it remains unclear how *Tbx3* expression emerges dynamically from these states.

As described in the main text, to verify that changes in the expression levels of the marker genes corresponded to collective changes in expression levels of multiple genes, we performed RNA-seq on subpopulations of cells sorted using fluorescent reporters for the three marker genes described above. We sorted out *Esrrb/Tbx3* negative (E-T-), *Esrrb*-positive/*Tbx3*-negative (E+T-), and *Esrrb/Tbx3* positive (E+T+) cells, as well as *Zscan4*-positive (Z+) and -negative (Z-) cells, and observed hundreds of genes that were differentially expressed between these states (Figure 3D), indicating that variations in marker gene expression do not simply reflect intrinsic noise, or fluctuations in the expression of individual genes, but rather indicate broad transcriptional changes. More specifically, compared with E+T- cells, E-T- cells expressed lower levels of pluripotency regulators (Figure 3Di), and higher levels of differentiation markers and signaling proteins (Figure 3Dii). In contrast, E+T+ cells showed reduced expression levels of signaling proteins and differentiation markers and increased levels of pluripotency genes compared to E+T-, suggesting that *Tbx3* could

mark a more pluripotent state. Moreover, we observed increased expression levels of 2C-associated genes like *Tmem92*, *Tcstv3*, *Tdpoz3/4*, and *Zfp352* in the *Zscan4*-positive cells compared with the *Zscan4*-negative cells (Figure 3Diii). This result is consistent with *Zscan4* marking the previously reported 2C-like state (Macfarlan et al., 2012).

### Assigning Cells to the Pluripotent States

The probabilistic assignment of the *Esrrb* state is presented in Figure 2C and the STAR Methods. T+ state was defined as *Tbx3* transcript counts larger than 15. A threshold was obtained by comparing transcript counts to the direct observation of the promoter activity of *Tbx3* gene in individual ES cells that had a knock-in fluorescent reporter for both endogenous loci of the *Tbx3* gene (see Figures S2Ci and S2D). *Zscan4* expression levels were observed to be largely binary (Figure 3A). We used a threshold of 50 transcripts to assign cells to the Z+ state. Cells that were in the Z- and T+ states but were also in the E- state with a confidence level of at least 80% were assigned to the E-T+Z- state. We discarded any cells that were in the Z+ state but were also in the T+ state and/or the E+ state with a confidence level of 80% or higher (composing < 1% of observed cells). The inference results were not sensitive to changes in the thresholds used in defining the pluripotency states (see Figure S3).

### Inferring the Transition Rates

In Figure 4F, we directly inferred the transition rates from the two-cell correlation matrices and the population fractions of each state – without fitting – using the formalism in Box 1, and its generalization to non-uniform population fractions outlined in the STAR Methods. Each transition rate in Figure 4F is the rate that had the smallest statistical error of the three rates inferred for the same transition from the two-cell correlation matrices at distances  $u = 1$  to  $u = 3$ . The statistical error of the inferred transition rates was computed by bootstrapping over individual colonies: we randomly selected with replacement the same number of colonies as in the original dataset, with the probability of selecting a given colony proportional to the number of cells that it contained. KCA was performed on the resampled data 1000 times to estimate the variability in the inferred rates.

### Self-Consistency Checks on the Inferred Transition Dynamics

In this section, we validate the inferred ES cell state dynamics presented in the Results section of the main text and Figure 4.

First, the inference assumes that ES cell state dynamics are accurately represented as a stationary Markovian process with reversible transitions. If true, transition rates inferred from correlations between cells at different lineage distances (e.g., sisters versus cousins) should produce the same result. In fact, this was observed within statistical error (Figure S5B).

Second, it is often of great biological interest to know whether a given transition is reversible or irreversible, for example in the context of “de-differentiation” (see main text, Introduction). To test whether the system exhibits irreversible transitions we next computed the three-cell correlations (Main Text, Box 1). Recall that reversible dynamics can be correctly inferred using only the two-cell correlation functions. For such dynamics, the three-cell correlations should not contain any additional information about the dynamics beyond that found in the two-cell correlations. Therefore, observing the two-cell correlations should be sufficient to predict the three-cell correlations. Indeed, the three-cell correlation functions measured on the observed trees were consistent with the predicted values, validating the reversibility of the transitions (Figure S6).

Third, we tested the specific qualitative prediction that *Zscan4*-positive cells are generated from E+T+Z- cells that inactivate *Esrrb* and *Tbx3* in close succession right before activating *Zscan4*. To test this prediction, we acquired time-lapse movies of *Esrrb* and *Tbx3* using the double reporter described above, and then used smFISH to measure the endpoint expression levels of *Zscan4* in the same cells. In all cells where *Zscan4* was high by smFISH at the movies' end (11 trees had at least one Z+ cell), *Esrrb* and *Tbx3* reporters were observed to turn off within a single cell cycle of one another, as predicted. Examples are shown in Figure S5D.

Fourth, we verified that, where they overlapped, our results agreed with previous work on ES cell dynamics. For example, the rates of transition between the high and low metastable states of *Nanog* or *Zscan4* matched those observed from measurements of engineered reporter lines using re-equilibration following sorting or direct movie-based analysis (Chambers et al., 2007; Macfarlan et al., 2012; Miyanari and Torres-Padilla, 2012; Zalzman et al., 2010). Taken together, the self-consistency of the method, the direct experimental validation, and the agreement with previous work strongly support the notion that the KCA approach developed here can correctly infer state transition dynamics.

### The Two-State Model of *Esrrb* Figure 2 Is Consistent with the Inferred Chain-like Model in Figure 4

In the main text, we inferred the transition rates between *Esrrb* low (E-) and high (E+) states and showed that *Esrrb* switching dynamics is well approximated by a two-state Markovian process (Figure 2). We also analyzed transitions across a more general network including 5 states, which is also well-approximated as a Markovian stochastic process (Figure 4F). How can the same cellular dynamics be compatible with both models?

The existence of internal sub-states is not generally consistent with Markovian dynamics among the two *Esrrb* states. A two-state Markovian model implies that during any interval of time, there is a constant probability of transitioning from one state to another (for example, E- to E+). However, in the presence of sub-states, the probability of exiting the E- or E+ state will depend on which sub-state the cell is in.

The five-state transition network need not be compatible with effective two-state Markovian dynamics for *Esrrb*. However, we show here that for the specific transition rates in this case, the two-state reduction of the five-state model is still well-approximated by a two-state Markovian model within the statistical limitations of our finite datasets. More specifically, we simulated the five-state

model (Figure 4F) for 14 trees of 4 generations (same number of trees and generations as the data in Figures 2D and 2E). We then assigned states solely based on the *Esrrb* state, effectively ignoring the *Tbx3* and *Zscan4* expression levels. That is, E-T-Z- and E-T-Z+, and E-T+Z- cells were assigned to the E- state, while E+T-Z- and E+T+Z- cells were assigned to the E+ state. Note that this is equivalent to the measurements in Figure 2, where only *Esrrb* expression level is used to designate cell state, with the expression levels of the other genes ignored.

We then used the KCA framework to infer the transition matrix of *Esrrb* dynamics. The simulations were repeated 10,000 times to estimate the statistical uncertainty of the inference. Within statistical error, the transition rates inferred from pairs of cells at all lineage distances from  $u = 1$  to  $u = 4$  were equivalent, consistent with a two-state Markovian model. In fact, we needed to measure more than 5,000 end-state cells before a statistically significant deviation from the two-state Markovian model could be observed. In that case, the five-state model fits the data significantly better than the two-state model. The key point is that although the five-state model is a more accurate description of *Esrrb* dynamics, by correctly accounting for the internal sub-states within the E- and E+ states, the two-state model remains approximately valid within the statistical limitations of our finite dataset.

### Potential Benefits of Chain-like State Transition Networks

The inferred cell-state transition network in ES cells is a linear chain of 5 states. What implications does this type of transition network have for the maintenance of ES cells in culture, and for other systems that might utilize similar transition networks?

Previous work has suggested that to maintain a healthy population of ES cells in culture, each cell must transition through the E-T-Z+ state at some minimum frequency (Zalzman et al., 2010). This requirement was shown to be related to processes of telomere extension via telomere sister chromatid exchange (Zalzman et al., 2010) and global epigenetic resetting (Akiyama et al., 2015), which occur specifically in the *Zscan4*-positive state and helps maintain genomic stability and normal karyotype, and in turn the cell's potential to proliferate. Based on this, we asked how the different stationary networks shown in Figure 1D compare in the frequency with which cells visit the E-T-Z+ state.

To elucidate the differences between network architectures, we consider a simplified five state network where the last state (green color in Figure S7) plays a role equivalent to that of the E-T-Z+ state. That is, the viability of each cell depends on the number of generations that have elapsed since it last occupied this state. The other four states (red color) have no bearing on viability. For each of the three networks, we set all inter-state transition rates to identical values, ensuring equal population fractions for each state (Figure S7). Moreover, we selected the transition rates to ensure that the flux of the cells into the green state was the same for all three networks.

Every time a simulated cell visited the green state, we tabulated the number of generations elapsed since its most recent ancestor left that state. This represents the distribution of “waiting times” between consecutive visits to the green state. Since we selected the rates to ensure equal population fractions and equal fluxes into the green state, the mean waiting time for the three networks is identical.

Strikingly, however, the distributions of waiting times are very different for the different networks. In particular, the linear chain network results in a long-tailed distribution, where most cells return to the green state after a brief number of generations, but a relatively few cells spend a much larger amount of time between consecutive visits, and therefore exhibit waiting times much longer than the average (Figure S7A). The short waiting time for most cells is balanced by the exceptionally long waiting times of a minority. This is also reflected in the difference between the mean and median waiting time. By contrast, in the cycle motif (Figure S7B), almost all cells spend approximately the same amount of time between consecutive visits to the green state (close to the mean waiting time). Finally, the all-to-all network (Figure S7C) has a long-tailed waiting time distribution similar to that of the chain-like motif. However, the difference between its median and mean is not as pronounced.

What are the implications of these differences in waiting time distributions? In the chain, the relatively large discrepancy between the median and the mean implies that most cells would have relatively recently visited the *Zscan4*-positive state, increasing their viability. This is achieved at the expense of a relatively small fraction of cells that experience significantly longer waiting times, and therefore presumably would show reduced viability. In this way, the chain-like network could be advantageous in the cell culture context. Similar effects could also make this type of network advantageous in other contexts where a system may need to optimize for the largest fraction of cells entering into a critical state over time.

### DATA AND SOFTWARE AVAILABILITY

All the analysis software, including those used for movie tracking, FISH dot detection/counting, and KCA analysis is available upon request (see CONTACT FOR REAGENT AND RESOURCE SHARING). The data visualization package is also hosted on the Elowitz lab website: <http://www.elowitz.caltech.edu/>.

The accession number for the data reported in this paper is NCBI's GEO: GSE86417.

### ADDITIONAL RESOURCES

The complete end-point FISH data and the associated lineage relationships is available on the Elowitz lab website (<http://www.elowitz.caltech.edu/>) for interactive viewing using a novel visualization tool, CellLines, developed by the Elowitz Lab in collaboration with the Caltech Data Visualization Program.



**Cell Systems, Volume 3**

**Supplemental Information**

**Inferring Cell-State Transition**

**Dynamics from Lineage Trees**

**and Endpoint Single-Cell Measurements**

**Sahand Hormoz, Zakary S. Singer, James M. Linton, Yaron E. Antebi, Boris I. Shraiman, and Michael B. Elowitz**

Figure S1

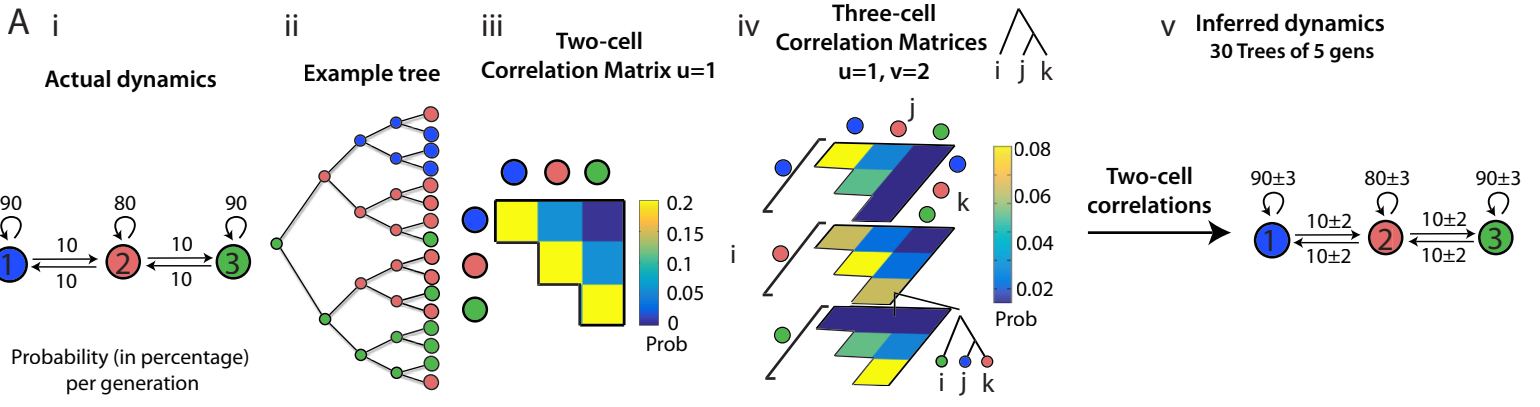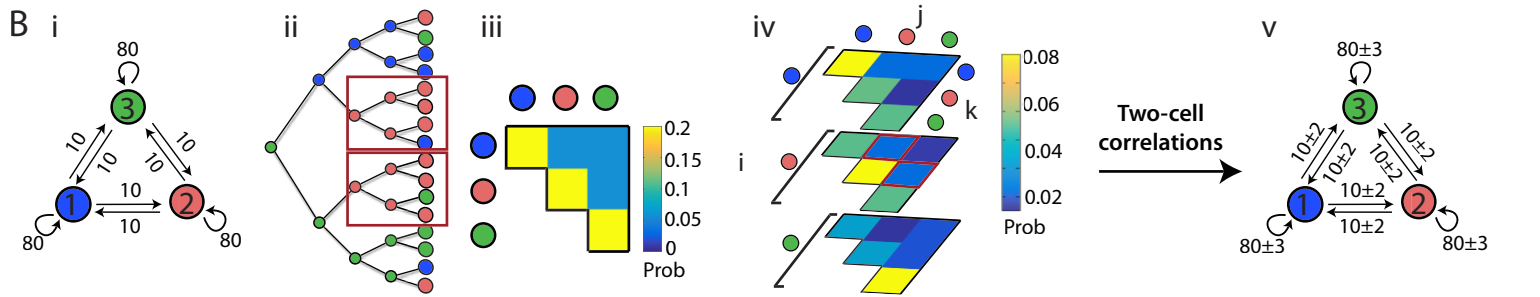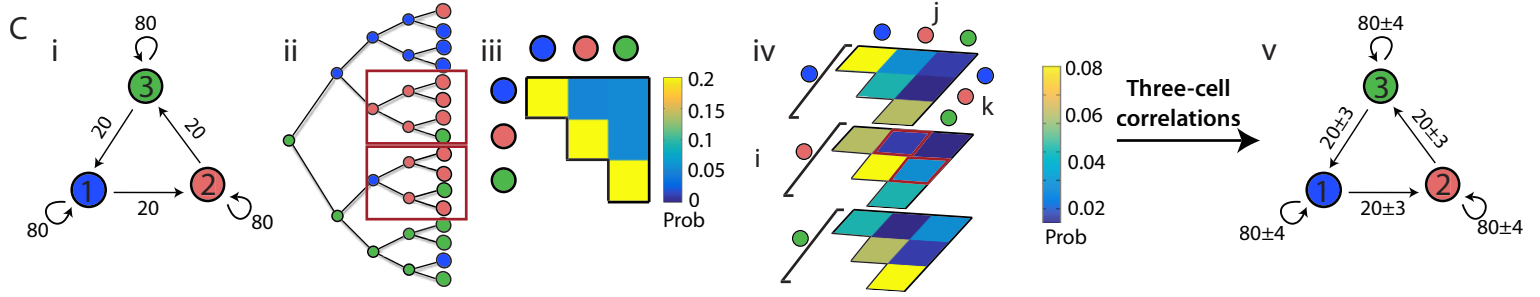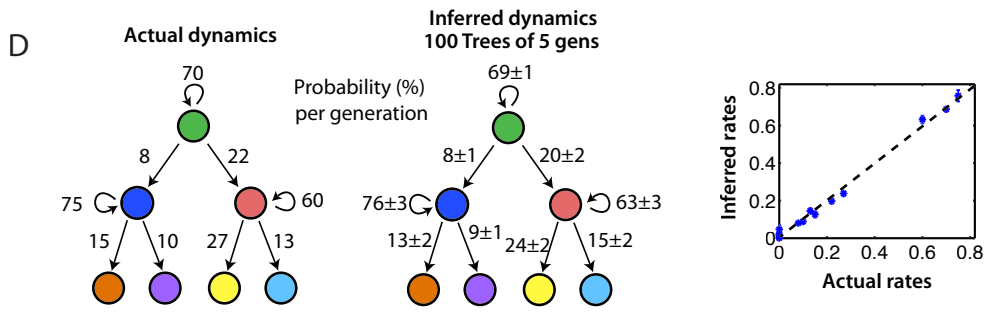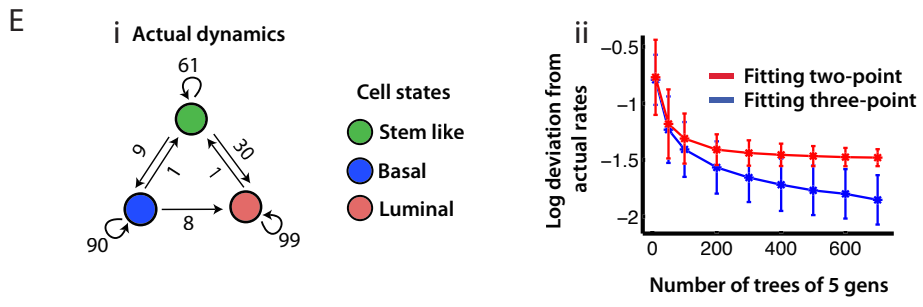

Figure S2

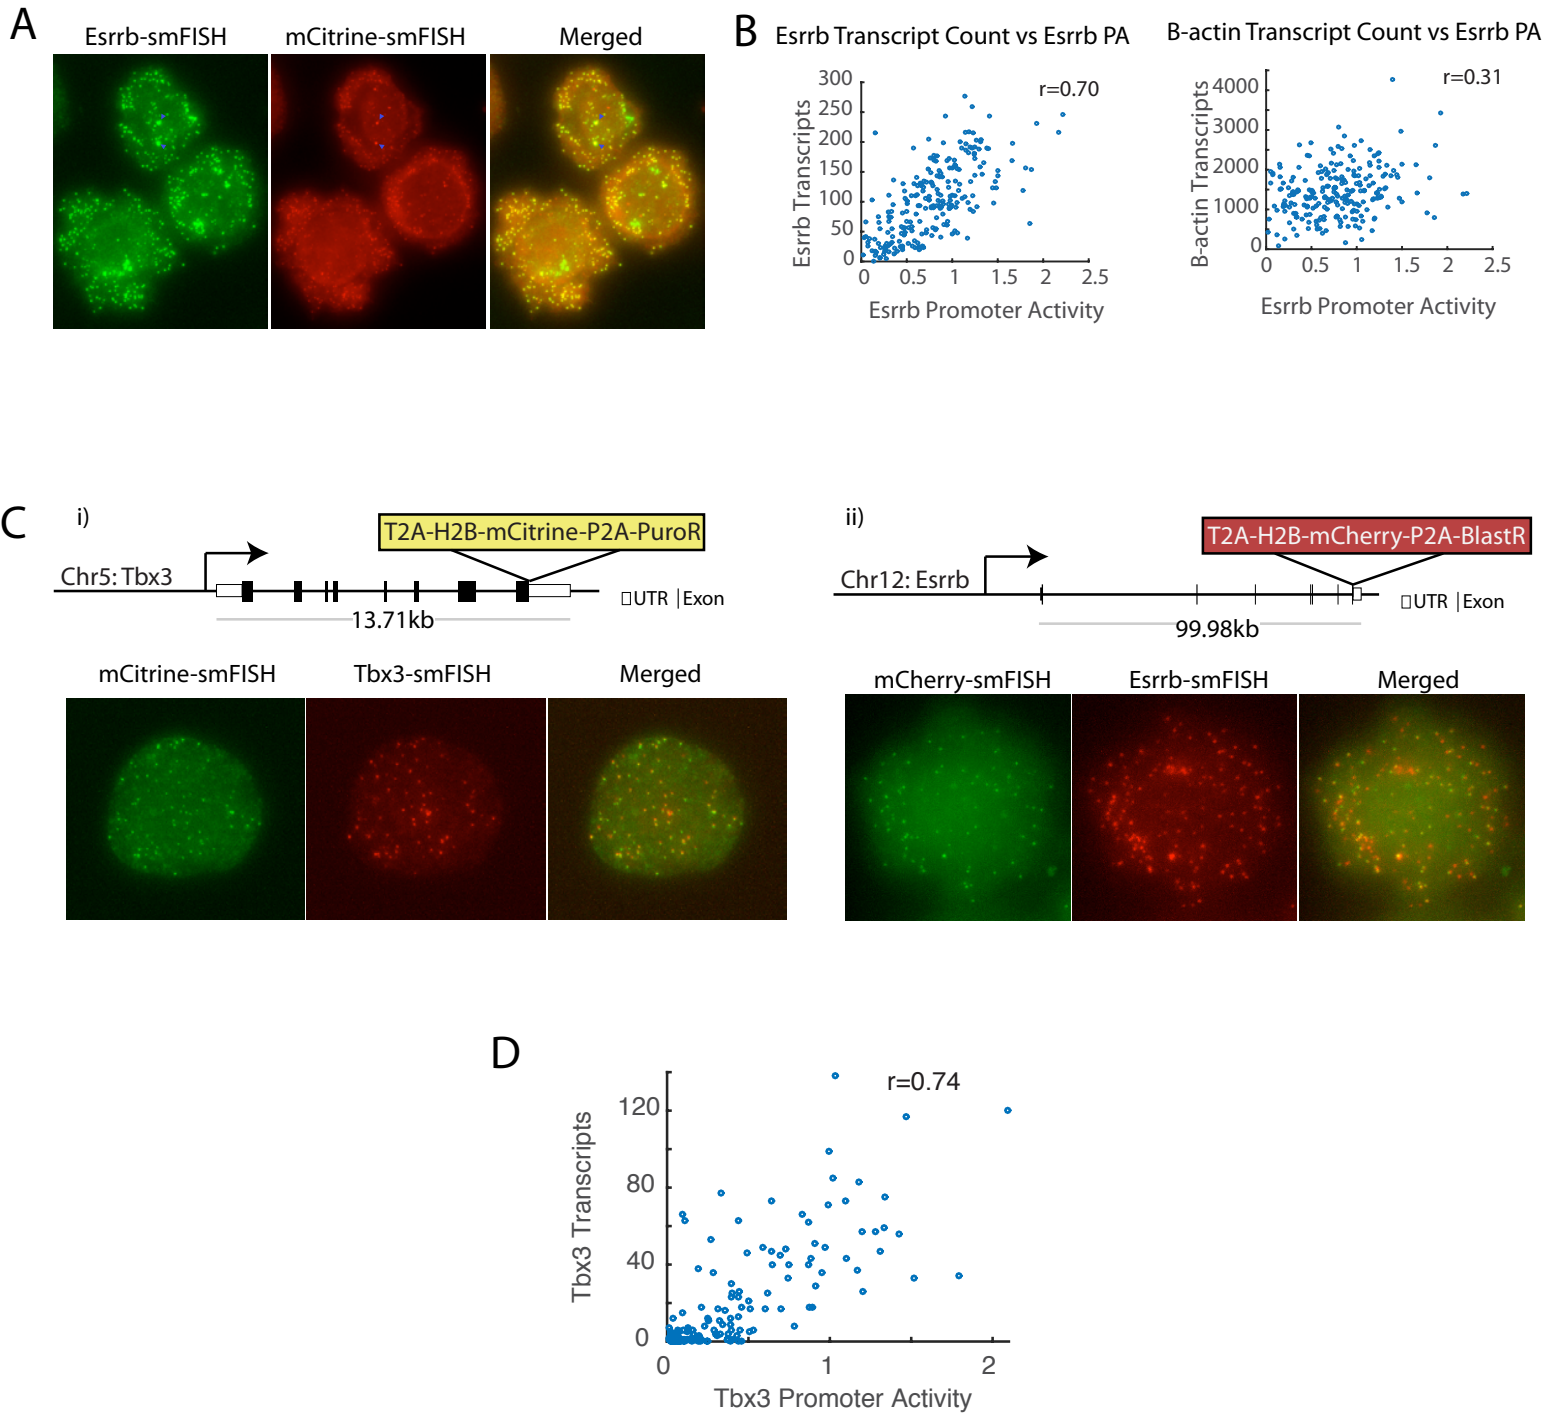

Figure S3

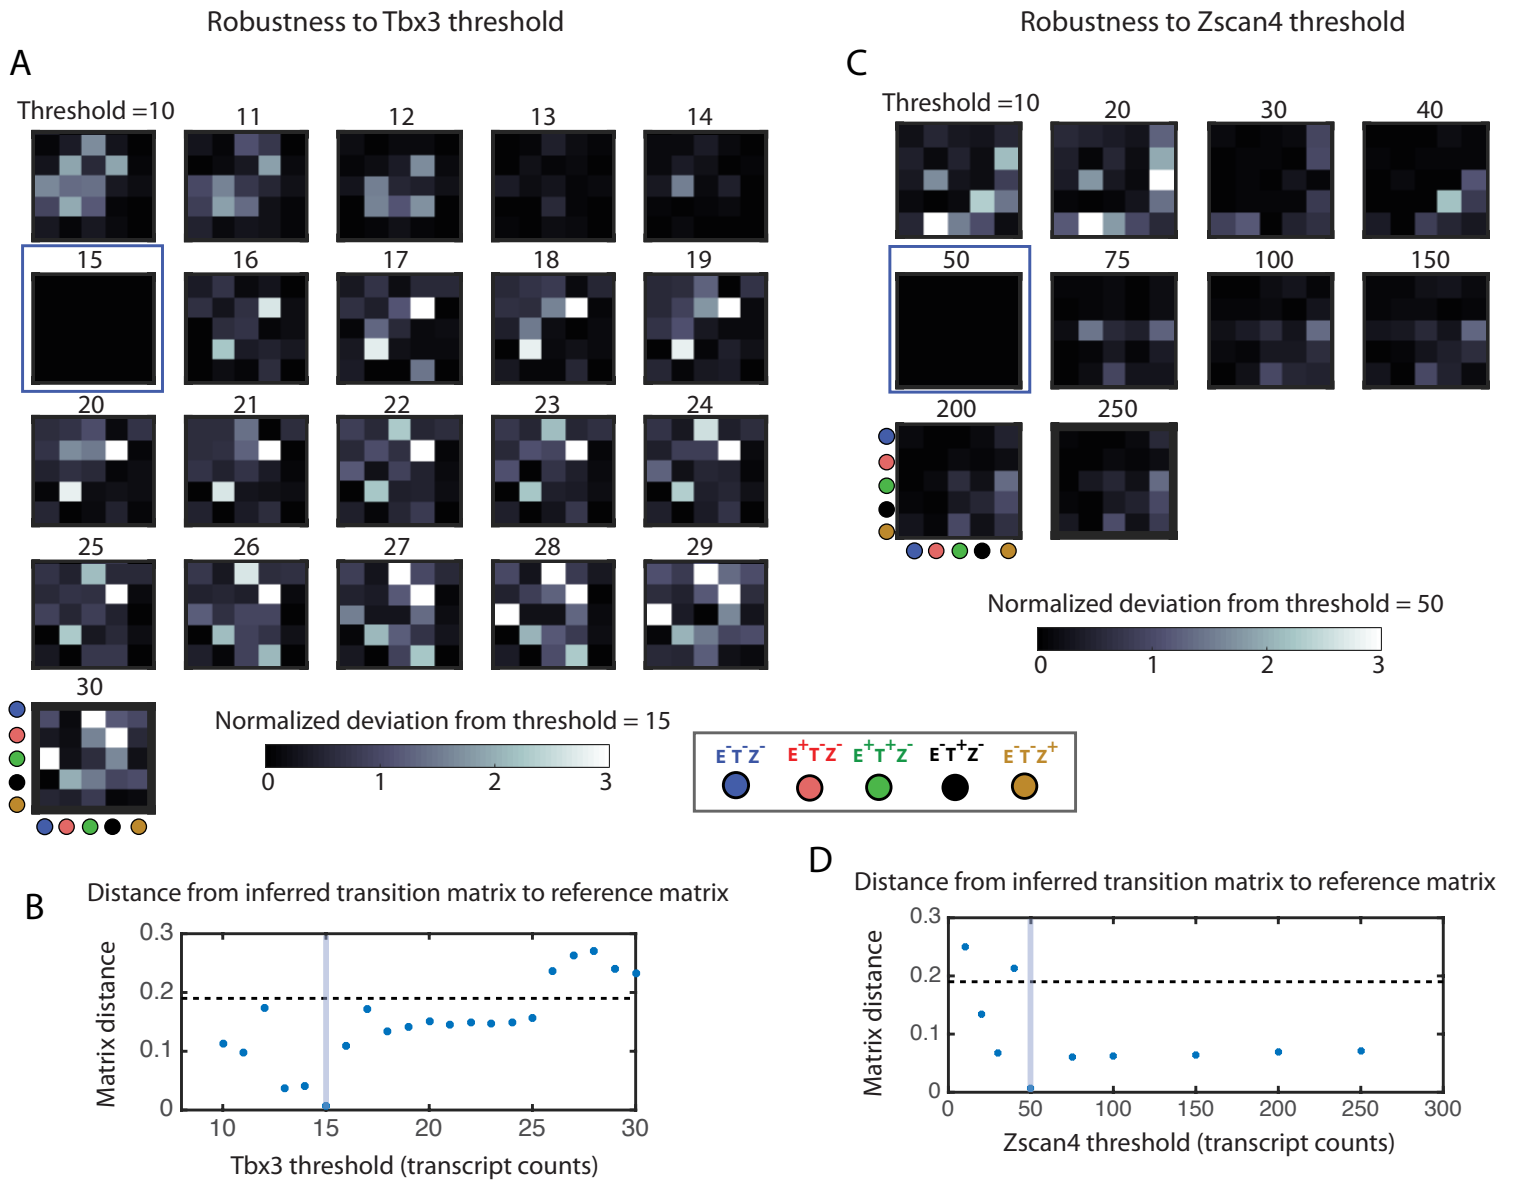

Figure S4

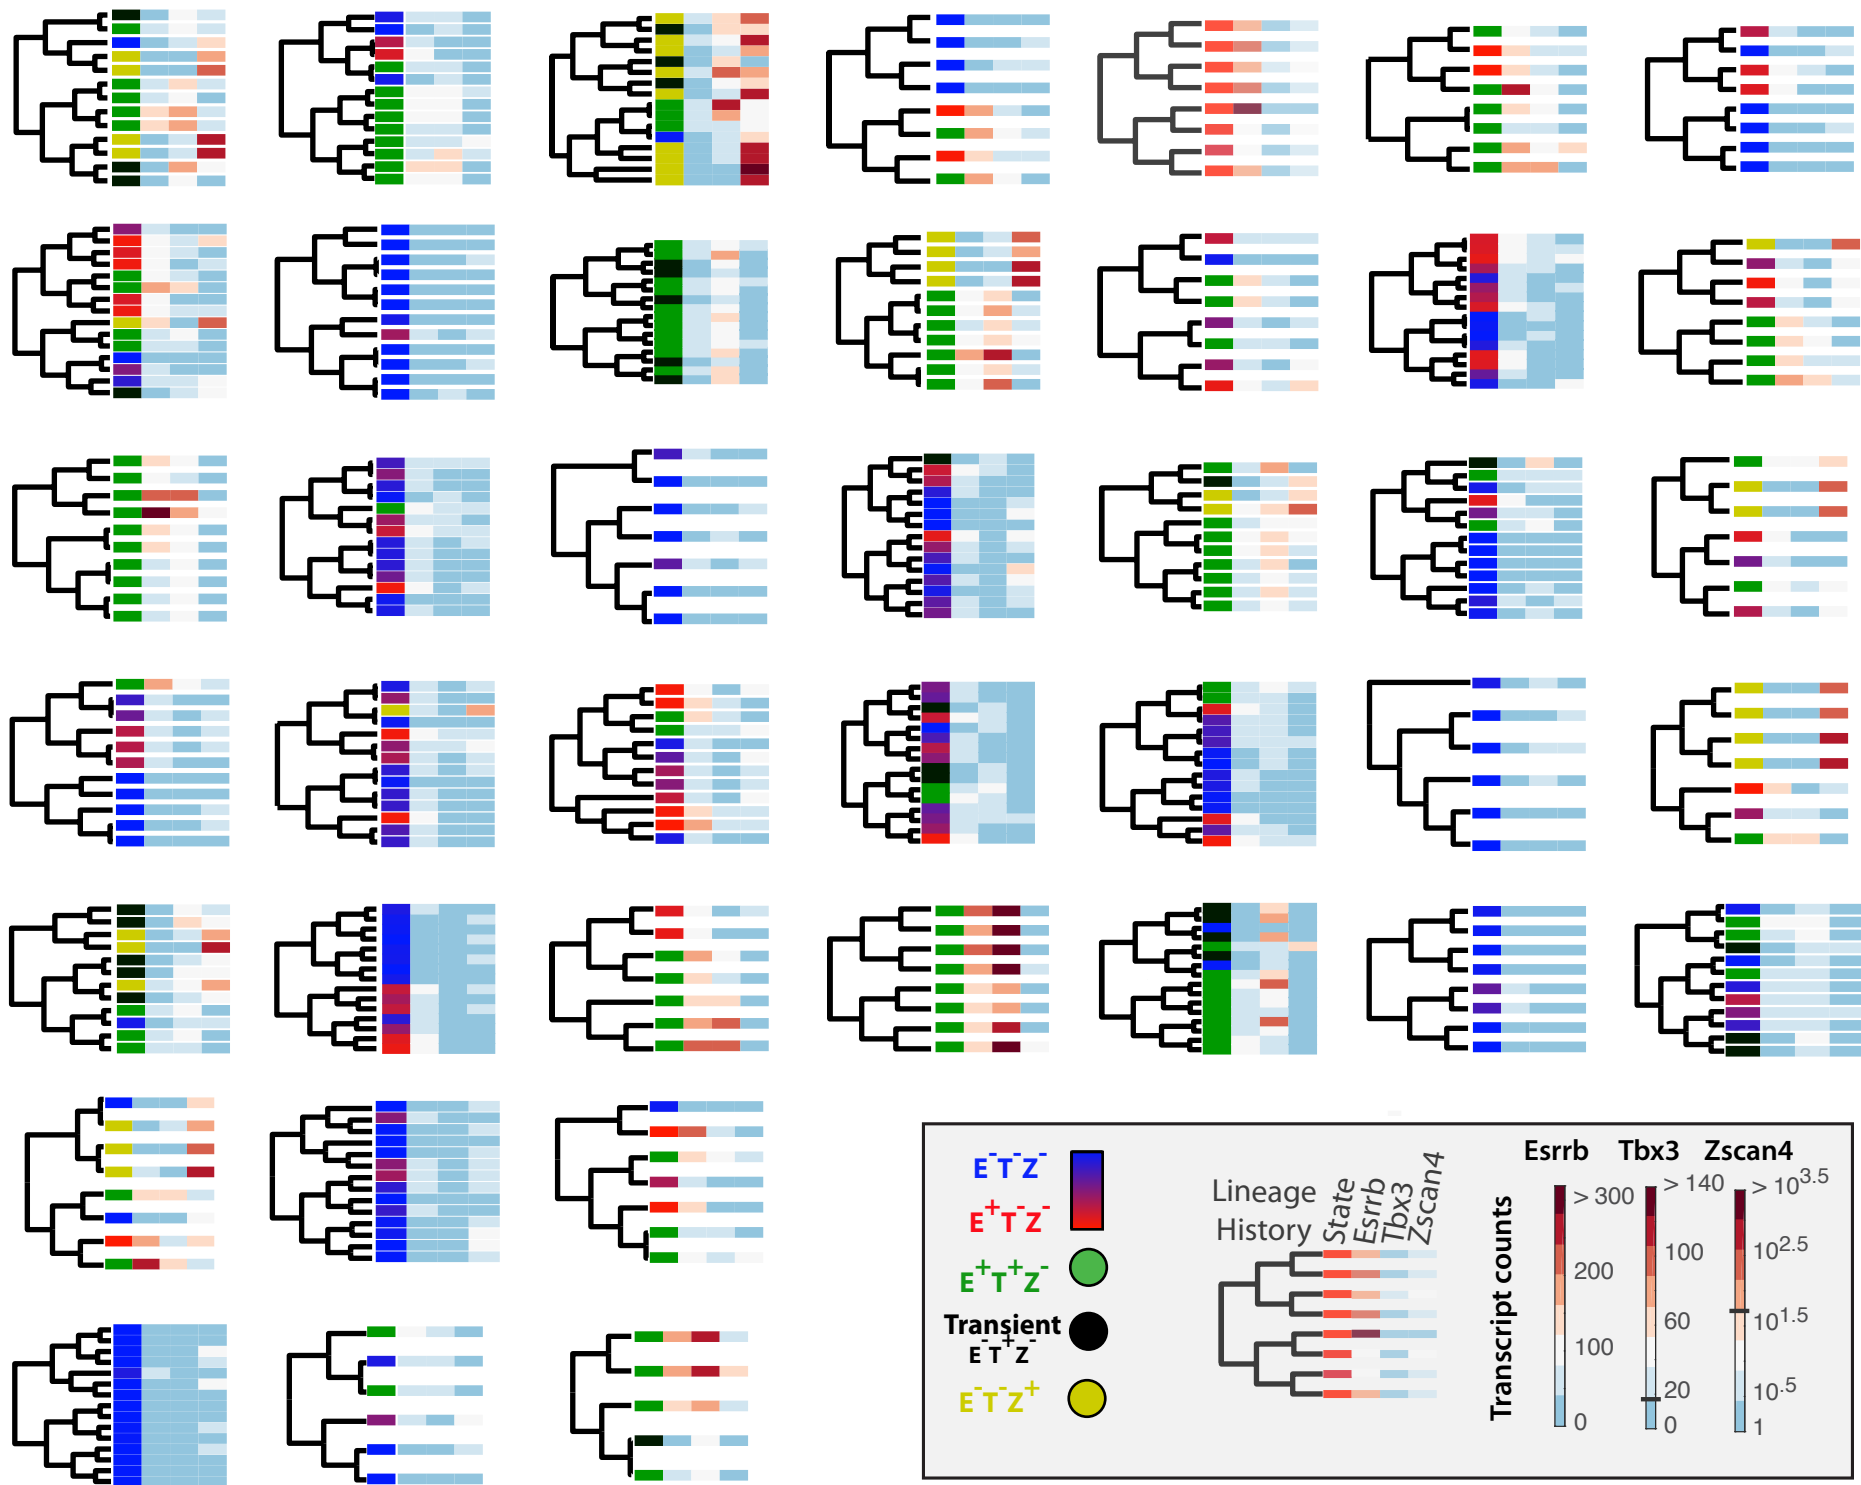

Figure S5

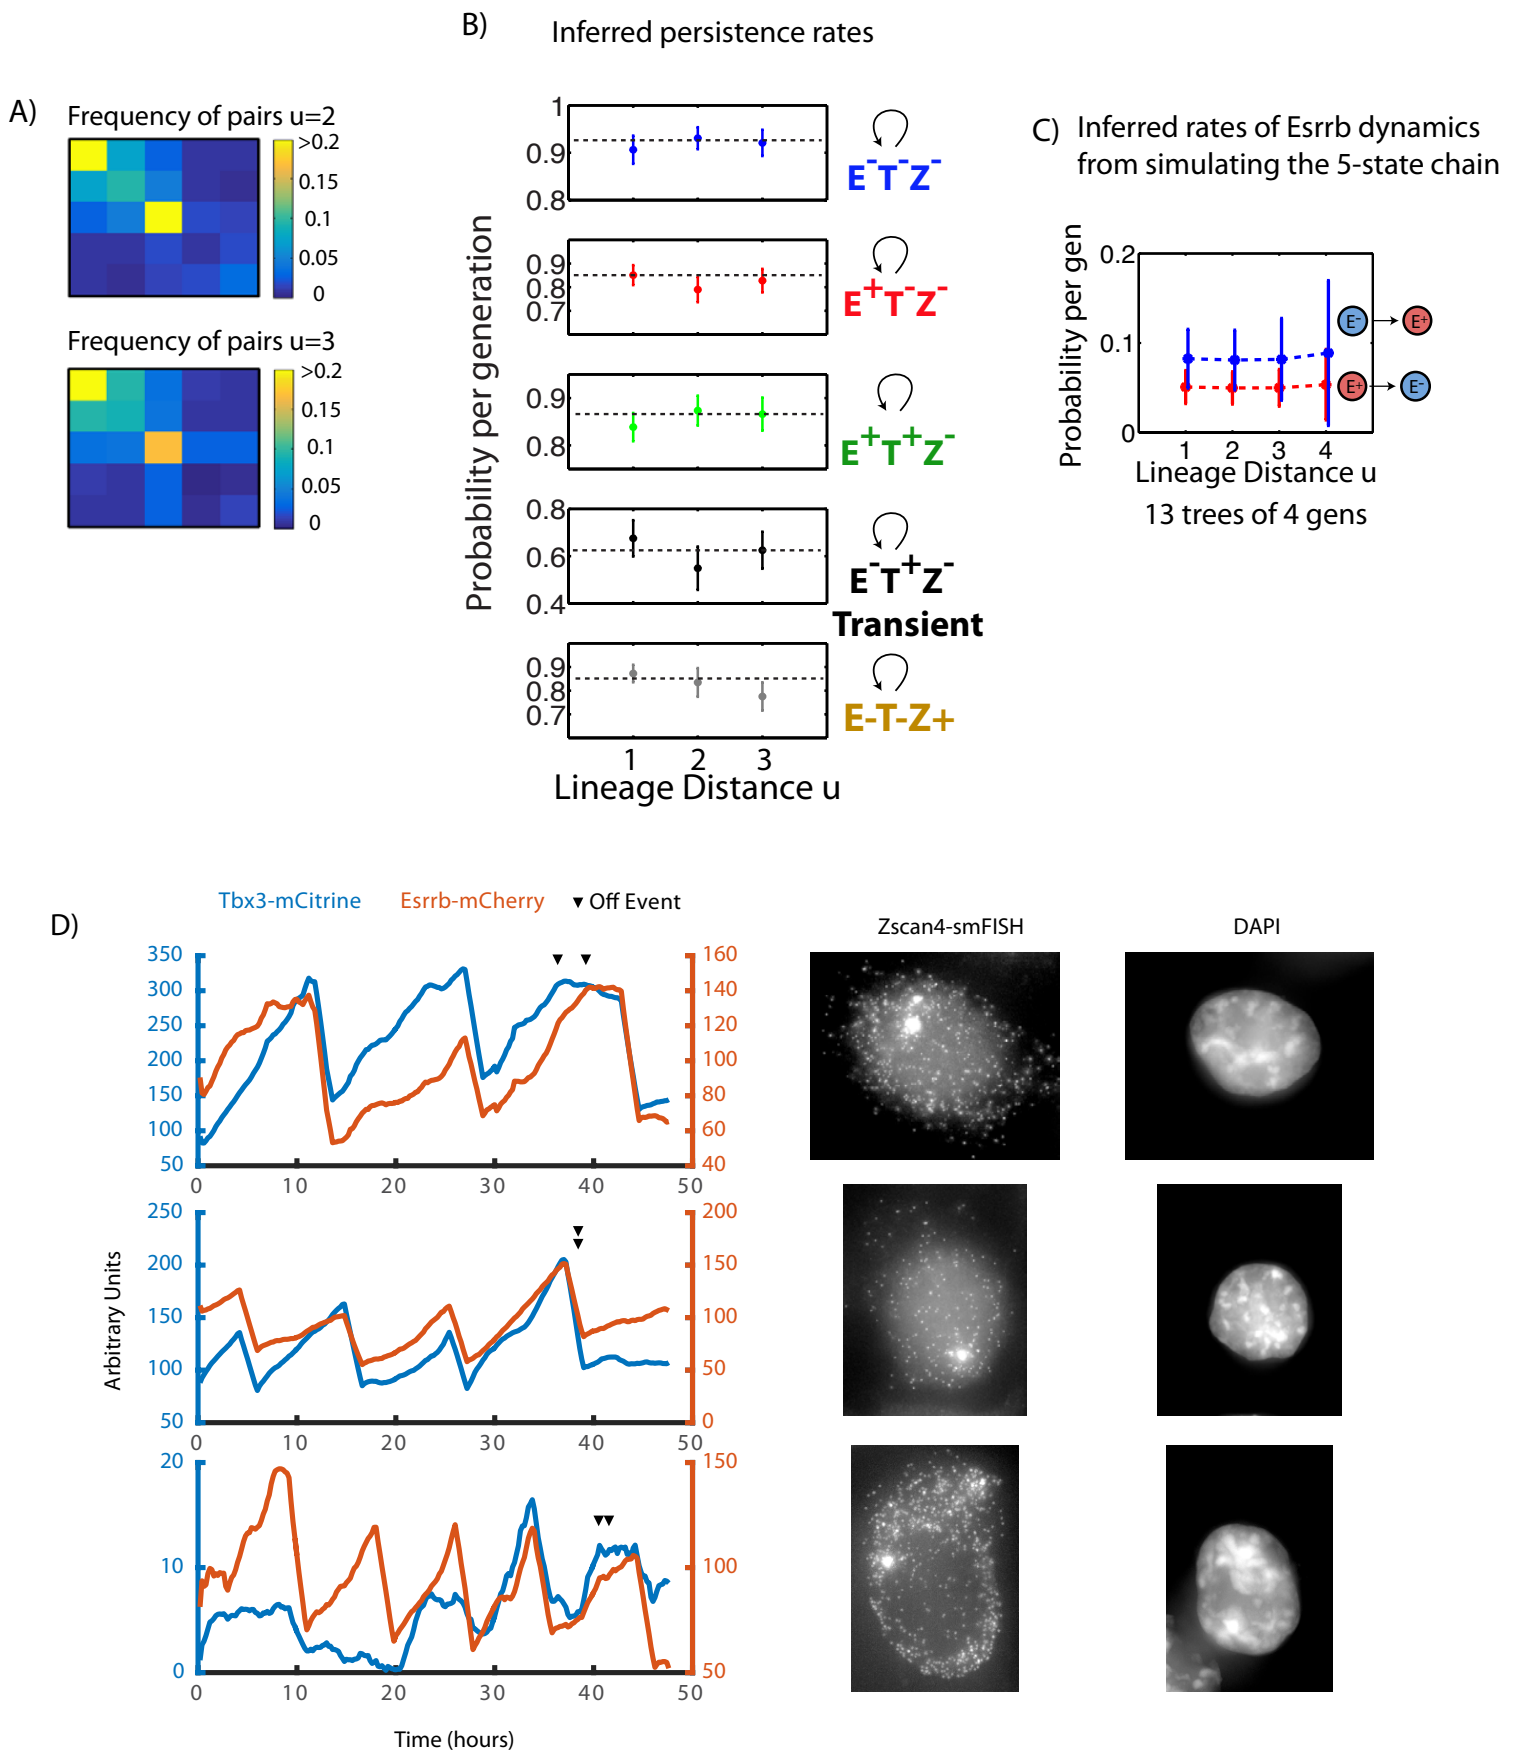

Figure S6

$$C_{ijk}(u=1, v=2)$$

Predicted Three-cell Correlation Matrices

Actual Three-cell Correlation Matrices

Statistical error of the actual  
(Fractional error of each  
matrix element)

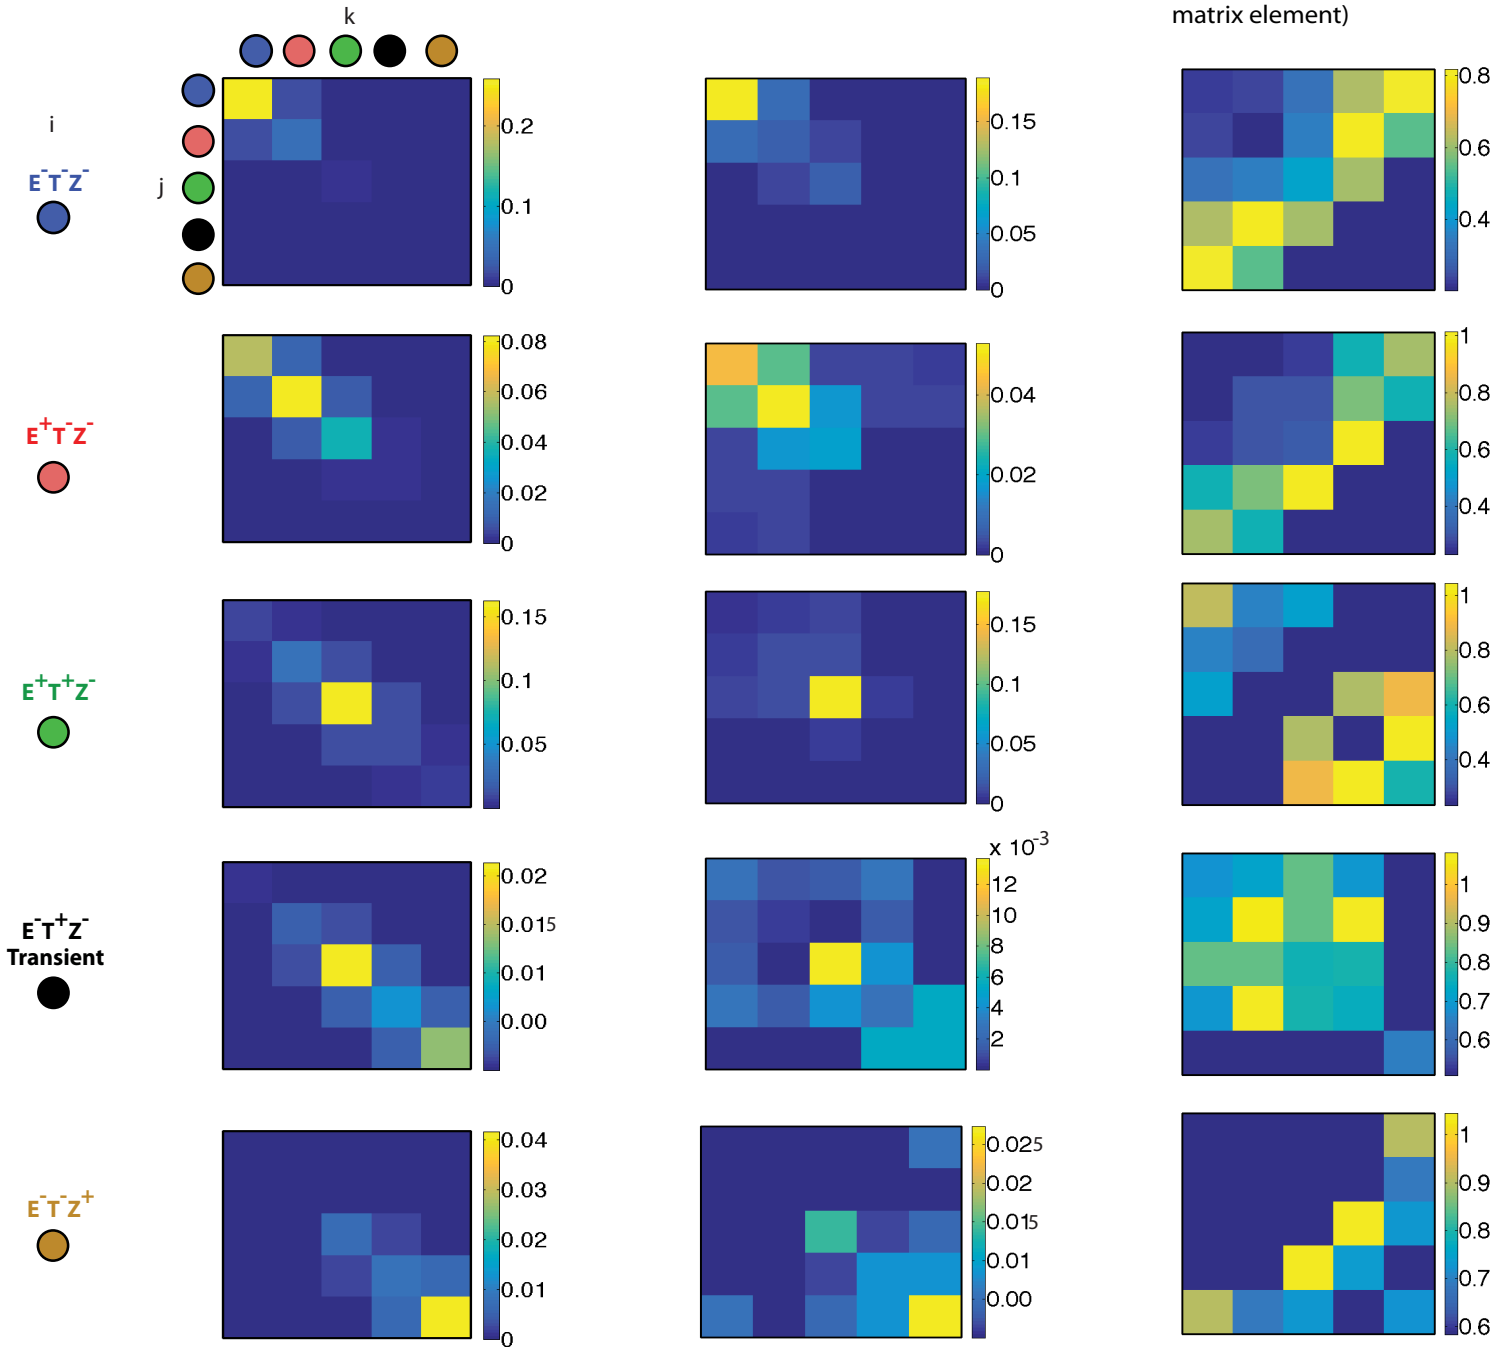

Predicted vs actual 3-cell correlations

Predicted vs actual 3-cell correlations

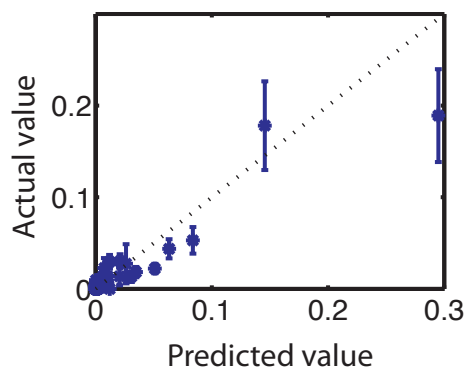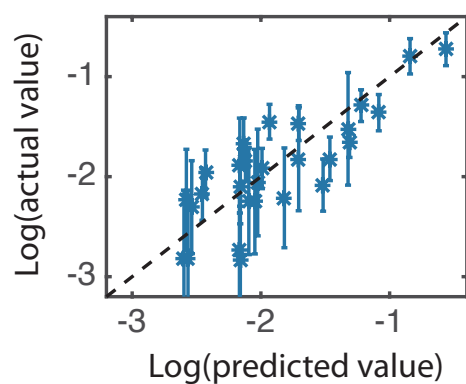

Figure S7

A

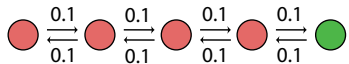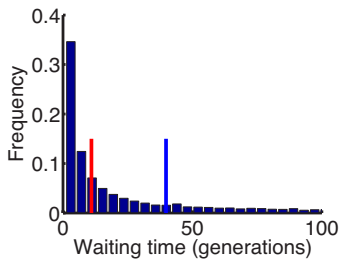

B

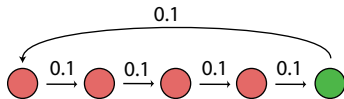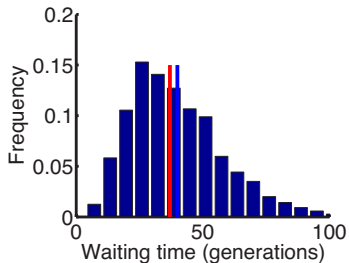

C

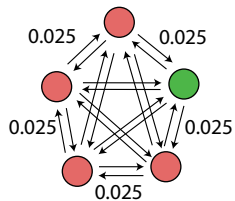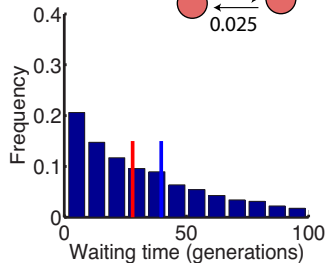



**Supplementary Movie 1; related to Figure 2.** Time-lapse movie shown in Fig 2B of H2B-mCitrine driven by *Esrrb*. Closely related cells quickly mix in space with more distantly related cells.

**Supplementary Table 1; related to Figures 2-4.** Sequences of smFISH probes used to detect transcripts of *Esrrb*, *Tbx3*, and *Zscan4*.

**Supplementary Table 2; related to Figures 2 and 3.** Sequences of the C-terminus regions of the endogenous genes *Esrrb* and *Tbx3* used as CRISPR/Cas9 targets to make the *Esrrb-mCitrine* reporter line (Figure 2) and the double (*Esrrb-mCherry* and *Tbx3-mCitrine*) reporter line (Figure 3 and S5).

**Supplementary Table 3; related to Figure 3.** RNA-seq mapped reads for the five subpopulations of cells, Z-, Z+, E-T-, E+T-, and E+T+.

### Supplemental Figure Captions

**Figure S1. KCA can infer the dynamics of a full range of cell state transition networks; related to Figure**

**1. (A)** (i) Chain-like linear transition network. (A.ii) Example pedigree showing typical transitions for the network in A.i in a proliferating colony of cells. (A.iii) Two-cell correlation matrix for sister cells ( $u=1$ ). (A.iv) Three-cell correlation matrices for triplets of cells at lineage distance  $u=1, v=2$ . (A.v) The inferred transition network from the two-cell correlation functions measured over 30 simulated trees of 5 generations (using the framework in Box 1). **(B)** (i) Same as in A but for a transition network comprised of a reversible cycle. (B.ii) A red cell can directly give rise to a progeny in either the blue or green states (red boxes). (B.iii-v) same as in A but for the reversible cycle network. **(C)** (i) Three-state cycle with irreversible transition. (C.ii) Only green cells can emerge as progenies of red cells (red boxes). Two-cell correlation functions do not capture the unidirectional nature of these transitions. Note that the two-cell correlation matrices are the

same in B.iii and C.iii. The three-cell correlation functions, however, are different between the two transition networks. In B.iv, the joint probability of observing the more distant relative of a triplet of cells and one of the two more closely related cells in the red state is the same when the third cell is in the green state or the blue state (outlined), consistent with reversible transitions. This is because a red cell can give rise to both green and blue progenies. In C.iv, however, the joint-probability of observing the same configuration is significantly higher when the third cell is in the green state than when it is in the blue state (boxed in red), consistent with the fact that red cells can only give rise to green cells. To infer the dynamics of the irreversible cycle (C.v), we used three-cell correlation functions (see STAR Methods). **(D)** Example of a developmental decision tree with irreversible directional transitions, and non-stationary dynamics. All cells initially start off in the green state and eventually transition to the terminal states at the bottom of the tree. KCA applied to three-cell correlation functions can be used to infer the dynamics of this system, as demonstrated here using 100 simulated trees of size 5 generations (right). **(E)** Recovery of Transition Rates Using KCA from a Cancer System with Irreversible Transitions. Example of measured cell state transition dynamics in cancer cell lines (Gupta et al., 2011). This system violates the condition of reversibility. Deviation of the inferred rates from the actual rates as a function of number of trees simulated. Three-cell correlation functions, but not two-cell correlation functions, are sufficient to infer the full dynamics with arbitrary accuracy, with increasing number of observations. The deviation of the inferred transition matrix from the actual one was computed as  $\sqrt{\sum_{ij} (T_{ij}^{actual} - T_{ij}^{inferred})^2}$ .

**Figure S2. Validation of the *Esrrb* reporter cell line; related to Figure 2.**

**(A)** smFISH analysis of endogenous *Esrrb* transcripts and knock-in *Esrrb* reporter transcripts in the same cell. Note that transcripts appear in both channels, including both active transcriptional sites (bright foci, blue arrows) and individual cytoplasmic mRNA molecules (dimmer dots). This indicates successful

homozygous targeting of the *Esrrb* locus. **(B)** *Esrrb* promoter activity (PA) extracted from the final cell cycle of movies before fixation (see Methods) correlates well with *Esrrb* transcript count at final time-point ( $r=0.71$ ), measured by smFISH (left). Note that  $\beta$ -Actin, a negative control, shows much weaker correlation ( $r=0.31$ ) with *Esrrb* promoter activity (right). **(C)** In order to sort cells and independently validate the inferred chain-like dynamics with movies, we constructed a second cell line containing non-perturbing reporters for *Esrrb* and *Tbx3* (schematic, see methods for knock-in construction). This line was validated by checking for co-localization of *mCitrine* transcripts with *Tbx3* transcripts (i) and *mCherry* transcripts with *Esrrb* transcripts (ii), and by genomic PCR (not shown). Note that while almost all *mCitrine* transcripts co-localize with *Tbx3* transcripts, indicating a double (homozygous) knock-in, only half the *mCherry* transcripts co-localize with *Esrrb*, indicating that the fluorescent reporter was incorporated into one *Esrrb* allele. **(D)** *Tbx3* promoter activity is correlated with *Tbx3* transcript count. By tracking movies of the *Tbx3*-mCitrine fluorescence, we computed promoter activity and used smFISH to quantify *Tbx3* transcripts at the endpoint. Here, we plot mRNA copy number versus promoter activity averaged over the final cell cycle. Transcript-counts higher than 15 reliably correspond to significant promoter activity.

**Figure S3. Robustness of the inference results to the choice of *Tbx3* and *Zscan4* thresholds; related to Figure 4.**

In this figure, we show that the inferred transition rate matrix does not depend sensitively on the choice of transcript-count thresholds used to define the high and low states for the genes *Tbx3* and *Esrrb*. **(A)** We varied the threshold for assigning a cell to the *Tbx3*-high (T+) state from 10 to 30 transcripts. We then repeated the same analysis as in Fig. 4E,F and inferred the transition rate matrix from the observed correlation functions. Each matrix shows the deviation of the inferred transition rate matrix from the reference transition rate matrix inferred using a threshold of 15 transcripts (the threshold used for the

analysis in Fig. 4). The deviations are normalized by the standard deviation of the reference transition rates computed using bootstrap over all the colonies (the error bars shown in Fig. 4Eii,F). The inferred transition rates are not significantly different for *Tbx3* thresholds of 10 to 17 transcripts. For higher thresholds, a significant rate emerges for the transition from the E+T-Z- state to the transient E-T+Z- state. This is because at higher thresholds cells that should be classified as E+T+Z- are instead classified as E+T-Z-.

**(B)** The deviation between the inferred transition matrix at a given threshold from the reference matrix (evaluated at threshold 15) computed using the Frobenius distance of the two matrices; Frobenius distance of two matrices  $A$  and  $B$  is defined as  $d(A, B) = \sqrt{\sum_{i,j} (A_{i,j} - B_{i,j})^2}$ . The dashed line is the deviation expected solely from the statistical uncertainty in the rates of the reference transition matrix that stems from the finite size of the data; two transition matrices inferred using the same thresholds from the same number of observed trees in different iterations of the experiment will on average deviate by this much. At high thresholds, the inferred transition rate matrix is significantly different. To directly verify that a threshold of around 15 indeed corresponds to activation of *Tbx3*, we used a *Tbx3*-mCitrine knock-in cell line (see main text for description and Figure S2D).

**(C)** Same analysis as in (A) but with the *Tbx3* threshold fixed at 15 and the *Zscan4* threshold varied from 10 to 250. Because *Zscan4* on cells can produce roughly hundred to thousands of transcripts (Fig. 3A), we do not expect significant sensitivity on the *Zscan4* threshold, as long as the threshold is sufficiently large to capture these events. The plots show the normalized deviation between the transition matrices inferred using various thresholds from the reference matrix that is inferred using a threshold of 50.

**(D)** The Frobenius distance between the transition rate matrices at different thresholds from the reference matrix. The inferred transition rates do not change significantly as the threshold is changed from 50 to 250 counts.

**Figure S4. Pedigrees reveal limited combinations of states; related to Figure 4.**

Pedigrees, gene expression levels, and cell state assignments for the 41 measured trees used to analyze the *Tbx3*, *Esrrb*, and *Zscan4* states. Closely related cells are typically found in the same state. Specific combinations of states occur frequently (e.g. E-T-Z- (blue) cells are related to E+T-Z- (red) cells). The gene expression columns correspond to expression levels of *Esrrb*, *Tbx3*, and *Zscan4* from left to right.

**Figure S5. Inference and validation of a five-state network in ESCs; related to Figure 4.**

**(A)** The two-cell correlation matrix of the trees in Figure S4 for pairs of cells at lineage distance  $u = 2$  (top) and lineage distance  $u = 3$  (bottom). **(B)** For each of the five states in Figure 3, we plot the inferred state stability (diagonal terms of the transition matrix) as a function of lineage distance,  $u$ . Dashed line serves as a guide for the eye to indicate constant rates over time. Note that rates are constant with respect to  $u$  within error bars, estimated by bootstrap. **(C)** To verify that the chain-like model (Fig. 4F) is consistent with the two-state approximation of *Esrrb* dynamics in Figure 2, we simulated the dynamics of the 5-state chain for 14 trees of 4 generations each. We discarded *Tbx3* and *Zscan4* information, and assigned each cell to a state only based on its *Esrrb* level. KCA was used to infer the transition rates between the two composite *Esrrb* states. Simulations were repeated 10,000 times to estimate the statistical error of the inferred rates. Note that inferred rates were consistent with measured rates for *Esrrb* dynamics (Fig. 2Eiv) (blue line indicates low to high transition rate, and red line indicates high to low transition rate). Thus, although *Esrrb* dynamics are not precisely described by a two-state Markovian process, they are nevertheless well-approximated by such a model within the statistical limits of the data sets obtained here. At the same time, the 5-state linear chain inferred in Figure 4 provides a more accurate description of these dynamics (see STAR Methods). **(D)** The inferred 5-state chain (Fig. 4F) predicts that E-T-Z+ cells emerge from E+T+Z- via a transient state (black circle). As a result, *Esrrb* and *Tbx3* should both turn off almost simultaneously just prior to *Zscan4* activation. Using the *Tbx3*/*Esrrb* double reporter line

(Fig. S2C), we observed these predicted dynamics in movies. Here, three example of abrupt and nearly simultaneous shut-off of both *Esrrb* and *Tbx3* near the end of the movie (event indicated by the arrowheads, and subsequent plateauing of total fluorescence in each trace, consistent with no further fluorescent protein expression), and subsequent expression of *Zscan4* by smFISH (right); also shown is the DAPI stained nucleus of the same cells.

**Figure S6. Three-point analysis of the ES cell state transition network; related to Figure 4.**

Comparison of the two-cell and the three-cell correlation analysis. The predicted and the observed three-cell correlation functions. Left column: the calculated three-cell correlation functions for a triplet of cells at lineage distances  $u=1$  and  $v=2$ , computed from the transition rates inferred from the two-cell correlation functions shown in Figure 4E. See STAR Methods for how the three-cell correlation functions are calculated from the transition matrix. The three-cell correlations are  $5 \times 5 \times 5$  matrices, represented here as 5 square  $5 \times 5$  matrices. The second column shows the actual three-cell correlations measured directly using the observed trees (Figure S4). The third column shows the corresponding statistical error (fractional error of each entry) in the rightmost column. Notice that the predicted three-cell correlation functions are consistent with the observed three-cell correlation functions, validating the inferred chain. This is also shown in the plots at the bottom. Left plot shows the predicted versus actual three-cell correlations, and statistical errors. In this plot, each point represents one of the 75 independent matrix elements (for  $N$  states, there are  $N^2(N+1)/2$  unique matrix elements). (Right) Plot of the logarithm (base 10) of the predicted and actual three-cell correlations. Only values larger than 0.001 are plotted. Note also that there are no free parameters in this figure. The agreement between the predicted and actual three-cell correlations is obtained without any fitting.

***Figure S7. Distribution of waiting times between consecutive visits to a given state varies between different network motifs; related to Figure 4 and STAR Methods section "Potential benefits of chain-like state transition networks."***

The dynamics of the three state transition networks shown here, A) Chain-like linear B) Irreversible cycle, and C) All-to-all, were simulated. Every time a simulated cell visited the green state, we tabulated the number of generations that had elapsed since its most recent ancestor left that state. From this, we computed the distribution of "waiting times" between consecutive visits to the green state for each type of network (blue bar plot). As expected, the mean waiting time (blue line) is the same for all three networks. The transition rates were selected to ensure that the flux of cells into the green state and the population fractions are the same across the networks, also ensuring identical mean waiting-times. The distribution of waiting-times, however, differs significantly between the networks. In particular, the chain-like linear network exhibits the smallest median (red line), implying that most cells in the population have visited the green states relatively recently, at the expense of a minority that have experienced larger than average waiting-times. Assuming that visiting the green state enhances the viability of the cells, this could be beneficial for the culture as a whole.
